# Supplementary material
Source: ML conference proceedings conference paper supplement (https://openreview.net/forum?id=WAFD6VYIEa)
Supplement: supplementary_material [file Learning_to_Clarify_by_RL_full.pdf › Learning_to_Clarify_by_RL_full.pdf]

---

# Learning to Clarify by Reinforcement Learning Through Reward-Weighted Fine-Tuning

---

Anonymous Author(s)

Affiliation

Address

email

## Abstract

1        Question answering (QA) agents automatically answer questions posed in natural  
2        language. In this work, we learn to ask clarifying questions in QA agents. The key  
3        idea in our method is to simulate conversations that contain clarifying questions  
4        and learn from them using reinforcement learning (RL). To make RL practical, we  
5        propose and analyze offline RL objectives that can be viewed as reward-weighted  
6        supervised fine-tuning (SFT) and easily optimized in large language models. Our  
7        work stands in a stark contrast to recently proposed methods, based on SFT and  
8        direct preference optimization, which have additional hyper-parameters and do not  
9        directly optimize rewards. We compare to these methods empirically and report  
10       gains in both optimized rewards and language quality.

## 11    1 Introduction

12    *Question answering (QA)* is a field at the intersection of *natural language processing (NLP)* and  
13    information retrieval concerned with building systems that answer natural language questions. The  
14    emergence of *large language models (LLMs)* [49, 8, 6] led to a major interest in this area, and many  
15    different approaches have been proposed. Earlier works on QA explored extensively single-turn QA  
16    in open-book [51, 11, 32] and closed-book [52, 7] settings. More recent works focused on complex  
17    QA [44, 34], including interactive QA and answering ambiguous questions. For instance, Lu et al.  
18    [40] learned a classifier with an LLM backbone to predict if a clarifying question should be asked,  
19    Hahn et al. [23] proposed an uncertainty-based approach that adaptively asks clarifying questions  
20    to improve multi-turn text-to-image generation, Kobalczyk et al. [31] selected clarifying questions  
21    based on information gain using a pre-trained LLM, and Andukuri et al. [2] formulated this problem  
22    as multi-step optimization and solved it using *supervised fine-tuning (SFT)*.

23    We also formulate this problem as multi-step optimization and learn to ask clarifying questions using  
24    *reinforcement learning (RL)* [60]. The closest related works are Andukuri et al. [2] and Chen et al.  
25    [13], which use RL to learn clarifying questions from simulated user-agent conversations. While we  
26    adopt the same learning paradigm, our work differs in how it is used. Andukuri et al. [2] choose the  
27    most rewarding trajectories and fine-tune on them. Chen et al. [13] generate alternative responses  
28    for each step of the conversation and then optimize for better responses using DPO [50]. The main  
29    limitation of these approaches is that they do not fully utilize the reward signal; they only use it to  
30    turn the original problem into an SFT or DPO problem. We directly optimize for rewards using RL.  
31    We observe major gains over SFT and DPO in experiments (Section 4) because both can be viewed  
32    as reward thresholding, which results in information loss when compared to using actual rewards.

33    We solve our problem using offline RL [33, 78, 35] and make two technical contributions to make it  
34    practical. First, our offline RL problem does not involve ratios of propensity scores, such as in PPO  
35    [56] and GRPO [57]; and in fact is equivalent to weighted SFT. Therefore, it can be solved easily in  
36    any LLM using standard training primitives. We implement our solution by modifying SFT in TRL

[64]. Second, we propose a variance reduction technique based on standardized trajectory rewards using multiple sampled trajectories. This lowers variance in policy optimization and may lead to learning better policies. We observe this effect in our experiments (Section 4).

We make the following contributions:

1. We formulate the problem of learning to ask clarifying questions as RL for conversation optimization. We do not make any strong assumption on the reward. Our setting encompasses both fixed-horizon conversations and adaptive ones, where the agent can stop the conversation early because enough information to answer the question has been gathered.
2. We derive an offline RL objective, which is a lower bound on the original objective. Therefore, the original objective is optimized by maximizing the new one. The new objective is equivalent to weighted SFT and hence can be optimized easily in LLMs using standard SFT training primitives. The weights are over sequences of tokens, unlike individual tokens in prior works [53, 21, 73, 77], and we also avoid ratios of propensity scores [56, 57].
3. We derive an offline RL objective with standardized rewards. The promise of standardized rewards is lower variance in policy optimization, which usually leads to better policies. We show this empirically in Section 4.
4. We comprehensively evaluate our approach on multiple QA datasets spanning open book exams, textual information for science topics, conversational text-to-SQL dataset, and mathematical dialogue and problem solving. Although we optimize a single reward, we observe improvements in all other metrics, such as reasoning ability, pedagogical value, and confidence. We consider five baselines: two variants of SFT, two variants of DPO, and the original policy. We observe major gains over SFT and DPO because we directly optimize the reward signal using RL.
5. For each QA benchmark, we generate a rich dataset of 500 multi-turn conversations. We plan to make our code and datasets publicly available to encourage more work on learning to ask clarifying questions.

The paper is organized as follows. We formulate the problem of learning to ask clarifying questions as a reinforcement learning problem in Section 2. In Section 3, we formulate offline variants of our problem and show how to optimize them using weighted SFT. We report our results in Section 4 and discuss related work in Section 5. We conclude in Section 6.

## 2 Setting

We start with introducing our notation. We denote the marginal and conditional probabilities under the probability measure  $p$  by  $p(X = x)$  and  $p(X = x \mid Y = y)$ , respectively; and write  $p(x)$  and  $p(x \mid y)$  when the random variables are clear from context. The indicator function is  $\mathbb{1}\{\cdot\}$ . For a positive integer  $n$ , we define  $[n] = \{1, \dots, n\}$ . The  $i$ -th entry of vector  $v$  is  $v_i$ . If the vector is already indexed, such as  $v_j$ , we write  $v_{j,i}$ .

The problem of learning to ask clarifying question is viewed as a general *reinforcement learning* (RL) problem [60], where an *agent* interacts with a *user*. The agent asks the user questions and the user responds with answers. When the conversation ends, it is assigned a reward. The reward measures the quality of the conversation and the goal of the agent is to maximize it.

We formalize the problem as follows. The agent first observes *context*  $x \in \mathcal{S}$ , where  $\mathcal{S}$  is the space of token sequences. The context defines the task. The conversation between the agent and user consists of steps indexed by  $t \in \mathbb{N}$ , where  $\mathbb{N}$  is the set of positive integers. In step  $t$ , the agent takes an *action*  $a_t \in \mathcal{S}$  and *observes*  $y_t \in \mathcal{S}$ . The action  $a_t$  is a *question* and the observation  $y_t$  is the *user’s response*. The conversation ends after  $n$  steps and we represent it by a *trajectory*  $\tau_n = (a_1, y_1, \dots, a_n, y_n)$  of all actions and observations in the conversation. The number of steps  $n$  can be fixed or random. When it is random, it can be any function of the conversation history. The *reward* measures the quality of the conversation and is a non-negative function of  $x$  and  $\tau_n$ ,  $r(x, \tau_n) \geq 0$ . We do not make any additional assumption on the reward, such as that it factors over individual steps. This is to maintain generality and because our algorithms (Section 3) do not require it.

The agent follows a policy conditioned on the conversation history. Specifically, the probability that action  $a$  is taken in context  $x$  and history  $\tau_{t-1}$  is  $\pi(a \mid x, \tau_{t-1}; \theta)$ , and is parameterized by  $\theta \in \Theta$ .

89 We call  $\theta$  a *policy* and  $\Theta$  the space of policy parameters. The probability of observing  $y_t$  conditioned  
 90 on conversation history  $\tau_{t-1}$  and action  $a_t$  is denoted by  $p(y_t \mid x, \tau_{t-1}, a_t)$ . We slightly abuse our  
 91 notation and denote the probability of trajectory  $\tau_n$  in context  $x$  under policy  $\theta$  by

$$\pi(\tau_n \mid x; \theta) = \prod_{t=1}^n p(y_t \mid x, \tau_{t-1}, a_t) \pi(a_t \mid x, \tau_{t-1}; \theta). \quad (1)$$

92 The factorization follows from the chain rule of probability. Let

$$V(\theta) = \mathbb{E}_{x \sim q, \tau_n \sim \pi(\cdot \mid x; \theta)} [r(x, \tau_n)] \quad (2)$$

93 be the expected value of policy  $\theta$ , where  $q$  is a distribution over contexts  $x$ . Our goal is to maximize  
 94 the expected policy value,  $\theta_* = \arg \max_{\theta \in \Theta} V(\theta)$ .

95 Our framework is sufficiently general to model multiple use cases. For instance, suppose that we  
 96 want to maximize the pedagogical value of a conversation over  $n$  steps [55]. Then  $r(x, \tau_n)$  would  
 97 be the aggregated pedagogical value of  $\tau_n$  over  $n$  steps. As another example, suppose that we want  
 98 to learn to clarify an ambiguous question  $x$  by asking  $n$  questions [2, 13]. Then  $r(x, \tau_n)$  would be  
 99 the quality of the generated answer conditioned on  $x$  and  $\tau_n$ . Finally, suppose that the number of  
 100 clarifying questions is adaptively chosen by the agent, after enough information has been gathered  
 101 [31]. Then  $r(x, \tau_n)$  would be the quality of the generated answer multiplied by  $\gamma^n$ , where  $\gamma \in (0, 1)$   
 102 is a discount factor. The penalty for more steps  $n$  is critical. Otherwise, the agent could ask clarifying  
 103 questions forever because each answer increases the probability that the original question is answered  
 104 correctly. In this case, the number of clarifying questions  $n$  is random and decided by the agent.

### 105 3 Algorithms

106 Our objective is to maximize the expected policy value  $V(\theta)$  in (2). This can be done in a myriad  
 107 of ways [60]. The most natural approach for complex policies, like those represented by LLMs, are  
 108 policy gradients [69]. The key idea in *policy gradients* is to update the policy  $\theta$  iteratively by gradient  
 109 ascent. The gradient of  $V(\theta)$  at  $\theta$  is

$$\nabla V(\theta) = \mathbb{E}_{x \sim q, \tau_n \sim \pi(\cdot \mid x; \theta)} [r(x, \tau_n) \nabla \log \pi(\tau_n \mid x; \theta)]$$

110 and can be derived by a direct application of the score identity [1]. The computation of this gradient  
 111 is challenging for two reasons. First, since the trajectories  $\tau_n$  are sampled under the optimized policy  
 112  $\theta$ , they need to be resampled whenever  $\theta$  is updated; at each step of gradient ascent. Second, a reward  
 113 model  $r(x, \tau_n)$  is needed to evaluate any potentially sampled trajectory.

114 To address these challenges, we resort to *offline reinforcement learning* [33, 78, 35]. The key idea in  
 115 offline RL is to collect a dataset of trajectory-reward tuples once and then optimize a policy on it,  
 116 akin to learning a classifier in classic supervised learning. We denote the data logging policy by  $\pi_0$   
 117 and the probability of generating a trajectory  $\tau_n$  in context  $x$  using policy  $\pi_0$  by  $\pi_0(\tau_n \mid x)$ . A classic  
 118 result in control [18] and statistics [27] is that propensity scores,

$$V(\theta) = \mathbb{E}_{x \sim q, \tau_n \sim \pi(\cdot \mid x; \theta)} [r(x, \tau_n)] = \mathbb{E}_{x \sim q, \tau_n \sim \pi_0(\cdot \mid x)} \left[ \frac{\pi(\tau_n \mid x; \theta)}{\pi_0(\tau_n \mid x)} r(x, \tau_n) \right], \quad (3)$$

119 can correct for selection bias in the logged dataset. Simply put, the optimization of (2) is equivalent  
 120 to maximizing propensity-weighted rewards on a dataset of trajectories collected by another policy  
 121  $\pi_0$ . The main challenge with optimizing (3) is that the ratios of the propensity scores can be high.  
 122 This can be addressed by clipping [29] at a token level, which is the key idea in both PPO [56] and  
 123 GRPO [57]. We discuss differences from these methods at the end of Section 3.1. In the next section,  
 124 we outline our approach of reward-weighted fine-tuning for offline RL.

#### 125 3.1 Reward-Weighted Fine-Tuning

126 The key idea in our work is to maximize a lower bound on (2). While this bound is tight only when  
 127  $\pi(\cdot \mid \cdot; \theta) \equiv \pi_0$ , it leads to a practical offline RL algorithm that can be implemented as weighted SFT  
 128 *without introducing ratios of propensity scores*. We build on the lower bound in Liang and Vlassis  
 129 [37] and extend it to offline RL.

130 **Lemma 1.** For any policies  $\pi$  and  $\pi_0$ , and any non-negative reward function,

$$\mathbb{E}_{x \sim q, \tau_n \sim \pi(\cdot | x; \theta)} [r(x, \tau_n)] \geq \mathbb{E}_{x \sim q, \tau_n \sim \pi_0(\cdot | x)} [r(x, \tau_n) \log \pi(\tau_n | x; \theta)] + C_1,$$

131 where  $C_1 = \mathbb{E}_{x \sim q, \tau_n \sim \pi_0(\cdot | x)} [r(x, \tau_n)(1 - \log \pi_0(\tau_n | x))] \geq 0$  is a constant independent of  $\theta$ .

132 *Proof.* Using basic algebra,

$$\begin{aligned} \mathbb{E}_{x \sim q, \tau_n \sim \pi(\cdot | x; \theta)} [r(x, \tau_n)] &= \mathbb{E}_{x \sim q, \tau_n \sim \pi_0(\cdot | x)} \left[ r(x, \tau_n) \frac{\pi(\tau_n | x; \theta)}{\pi_0(\tau_n | x)} \right] \\ &\geq \mathbb{E}_{x \sim q, \tau_n \sim \pi_0(\cdot | x)} \left[ r(x, \tau_n) \left( 1 + \log \frac{\pi(\tau_n | x; \theta)}{\pi_0(\tau_n | x)} \right) \right] \\ &= \mathbb{E}_{x \sim q, \tau_n \sim \pi_0(\cdot | x)} [r(x, \tau_n) \log \pi(\tau_n | x; \theta)] + C_1. \end{aligned}$$

133 The inequality follows from  $u \geq 1 + \log u$  and non-negative rewards. This concludes the proof.  $\square$

134 The bound is expected to be loose in practice because we apply  $u \geq 1 + \log u$  for potentially large  $u$ .

135 The consequence of Lemma 1 is that

$$J(\theta) = \mathbb{E}_{x \sim q, \tau_n \sim \pi_0(\cdot | x)} [r(x, \tau_n) \log \pi(\tau_n | x; \theta)] \quad (4)$$

136 is a lower bound on (2). Because (4) is equal to (2) when  $\pi(\cdot | \cdot; \theta) \equiv \pi_0$ , a policy that improves (4)  
137 also improves (2). Next we show that (4) is equivalent to reward-weighted SFT. To see this, we plug  
138 the definition of the trajectory probability (1) into (4) and get

$$J(\theta) = \mathbb{E}_{x \sim q, \tau_n \sim \pi_0(\cdot | x)} \left[ r(x, \tau_n) \sum_{t=1}^n \log \pi(a_t | x, \tau_{t-1}; \theta) \right] + C, \quad (5)$$

139 where  $C = \mathbb{E}_{x \sim q, \tau_n \sim \pi_0(\cdot | x)} [r(x, \tau_n) \sum_{t=1}^n \log p(y_t | x, \tau_{t-1}, a_t)]$  represents the log-probabilities  
140 of observations weighted by trajectory rewards. Since the observation probabilities do not depend on  
141  $\theta$  (Section 2) and neither does  $\tau_n \sim \pi_0(\cdot | x)$ ,  $C$  is constant in  $\theta$ . Therefore, maximization of (5) is  
142 equivalent to maximizing  $n$  log-probabilities of actions  $a_t | x, \tau_{t-1}$  weighted by trajectory reward  
143  $r(x, \tau_n)$ . One natural interpretation is that we maximize trajectory probabilities proportionally to  
144 their rewards, by attributing the rewards equally to all actions in the trajectories. Our objective can  
145 also be viewed as weighted SFT with  $n$  terms. The terms are correlated because they belong to the  
146 same trajectory and are weighted by the same reward.

147 We compare (5) to related works on learning to ask clarifying questions by RL next. Andukuri et al.  
148 [2] apply SFT to most rewarding trajectories, which can be viewed as replacing  $r(x, \tau_n)$  in (5) with  
149 an indicator that the trajectory has a high reward. Chen et al. [13] learn to take the best action in  
150 each step by maximizing the negative DPO loss, which can be viewed as replacing each term in (5)  
151 with the DPO loss. We compare to these works empirically in Section 4 and observe major gains  
152 because they do not fully utilize the reward signal; they only use it to turn the original problem into a  
153 corresponding SFT or DPO problem.

154 Now we compare (5) to classic RL approaches in LLMs. They require token-level rewards or reward  
155 models, and have ratios of propensity scores in their objectives, as we discuss next. The advantage of  
156 (5) is that none of these are needed. To state differences more precisely, we let  $a_t$  be the  $t$ -th token in  
157 trajectory  $\tau_n$  with  $n$  tokens and  $t$  be chosen uniformly at random from  $[n]$ . Q-SFT of Hong et al. [26]  
158 can be viewed as maximizing  $\mathbb{E} [q_t \log \pi(a_t | x, \tau_{t-1}; \theta)]$ , where  $q_t$  is a Q-function estimate at token  $t$   
159 that depends on the reward at step  $t$ , a ratio of propensity scores for the next action, and maximization  
160 over it. The objective of PPO [56] is  $\mathbb{E} [\text{clip}(\pi(a_t | x, \tau_{t-1}; \theta) / \pi_0(a_t | x, \tau_{t-1}), A_t)]$ , where  $A_t$  is the  
161 advantage at step  $t$ , which is estimated using a reward model, and clip is a clipping operator. GRPO  
162 [57] can be viewed as PPO where  $A_t$  is estimated using a standardized simulated future reward. We  
163 do not compare to these methods empirically because they are not state-of-the-art baselines in our  
164 domain and their implementation requires token-level reward models, unlike Andukuri et al. [2] and  
165 Chen et al. [13].

## 166 3.2 Algorithm ReFit

167 We implement the optimization of (5) algorithmically in Algorithm 1 and call it reward-weighted  
168 fine-tuning (ReFit). A dataset  $\mathcal{D} = \{(x, \tau_n, r)\}$  collected by policy  $\pi_0$  is an input to ReFit and we

169 generate it as follows. First, we sample context  $x \sim q$ . Second, we sample trajectory  $\tau_n \sim \pi_0(\cdot | x)$   
 170 and compute its reward  $r(x, \tau_n)$ . Finally, we add  $(x, \tau_n, r(x, \tau_n))$  to the dataset.

171 After the dataset is sampled, we optimize policy  $\theta$  by gradient ascent. The gradient of  $J(\theta)$  at  $\theta$  is

$$\nabla J(\theta) = \mathbb{E}_{x \sim q, \tau_n \sim \pi_0(\cdot | x)} \left[ r(x, \tau_n) \sum_{t=1}^n \nabla \log \pi(a_t | x, \tau_{t-1}; \theta) \right]. \quad (6)$$

172 The optimization is iterative. In iteration  $i$ , we  
 173 approximate  $\nabla J(\theta)$  by the gradient  $g_i$  on a single  
 174 trajectory  $(x, \tau_n, r) \in \mathcal{D}$ . Since the trajectories  
 175 are generated i.i.d.,  $g_i$  is an unbiased estimate  
 176 of (6). After  $g_i$  is computed, we update the  
 177 policy as  $\theta + \alpha_i g_i$ , where  $\alpha_i > 0$  is a learning  
 178 rate. The optimization stops after a single epoch,  
 179 but more epochs are possible. We note that  $g_i$   
 180 is algebraically equivalent to the gradient on  $n$   
 181 SFT data points weighted by the same reward.  
 182 Therefore, we implement **ReFit** by modifying  
 183 SFT in TRL [64].

---

#### Algorithm 1 **ReFit** / **SWiFt**

---

- 1: **Input:** Learning rate schedule  $(\alpha_i)_{i \in \mathbb{N}}$
  - 2: Generate a logged dataset  $\mathcal{D} = \{(x, \tau_n, r)\}$ ,  
 where  $r \in \mathbb{R}$  is a reward of  $\tau_n$  (**ReFit**) or a  
 standardized reward of  $\tau_n$  (**SWiFt**)
  - 3: Initialize  $\theta$  and  $i \leftarrow 1$
  - 4: **for all**  $(x, \tau_n, r) \in \mathcal{D}$  **do**
  - 5:    $g_i \leftarrow r \sum_{t=1}^n \nabla \log \pi(a_t | x, \tau_{t-1}; \theta)$
  - 6:    $\theta \leftarrow \theta + \alpha_i g_i$  and  $i \leftarrow i + 1$
  - 7: **Output:** Learned policy  $\theta$
- 

### 184 3.3 Standardized Reward-Weighted Fine-Tuning

185 One challenge with (6) is that the empirical variance of the estimator can be high. As an example,  
 186 suppose that the rewards are in  $[9, 10]$ . Then the gradient would be scaled by 10 instead of 1, which  
 187 could be obtained by rescaling the rewards to  $[0, 1]$  and solving a seemingly equivalent problem. This  
 188 motivated many works on variance reduction of policy gradients [61, 5, 47]. This also motivates our  
 189 work on optimizing standardized rewards. We start by showing that the optimization of standardized  
 190 rewards is equivalent to optimizing (2) under certain assumptions.

191 **Lemma 2.** *Let  $\mu(x) \geq 0$  and  $\sigma(x) > 0$  be any non-negative functions of context  $x$ . Let  $\tilde{r}(x, \tau_n) =$   
 192  $(r(x, \tau_n) - \mu(x))/\sigma(x)$  be the standardized reward. Suppose that there exists  $\theta_*$  that maximizes all  
 193  $\mathbb{E}_{\tau_n \sim \pi(\cdot | x; \theta)} [r(x, \tau_n) | x]$  jointly. Then it also maximizes*

$$\mathbb{E}_{x \sim q, \tau_n \sim \pi(\cdot | x; \theta)} [\tilde{r}(x, \tau_n)] . \quad (7)$$

194 The proof is in Appendix A.1. The key assumption in Lemma 2, that there exists  $\theta_*$  that maximizes  
 195 all  $\mathbb{E}_{\tau_n \sim \pi(\cdot | x; \theta)} [r(x, \tau_n) | x]$  jointly, is expected to be satisfied or near-satisfied when the policy class  
 196 is rich, such as when represented by an LLM. This is because the policy is conditioned on  $x$ .

197 In the rest of this section, we derive an offline variant of (7) with similar desirable properties to (4) in  
 198 Section 3.1. The challenge with applying the same reasoning is that the standardized rewards  $\tilde{r}(x, \tau_n)$   
 199 can be negative. The error of our approximation is characterized below.

200 **Lemma 3.** *For any policies  $\pi$  and  $\pi_0$ , and any rewards in  $[-b, b]$ ,*

$$\left| \mathbb{E}_{x \sim q, \tau_n \sim \pi(\cdot | x; \theta)} [\tilde{r}(x, \tau_n)] - \mathbb{E}_{x \sim q, \tau_n \sim \pi_0(\cdot | x)} [\tilde{r}(x, \tau_n) \log \pi(\tau_n | x; \theta)] \right| \leq |C_1| + C_2 ,$$

201 where  $C_1$  is a constant independent of  $\theta$  defined in Lemma 1 and

$$C_2 = b \max_{\theta \in \Theta, x, \tau_n} \left( \frac{\pi(\tau_n | x; \theta)}{\pi_0(\tau_n | x)} - \left( 1 + \log \frac{\pi(\tau_n | x; \theta)}{\pi_0(\tau_n | x)} \right) \right) .$$

202 The proof is in Appendix A.2. Lemma 3 says that the difference between the online objective in (7)  
 203 and its offline counterpart

$$J(\theta) = \mathbb{E}_{x \sim q, \tau_n \sim \pi_0(\cdot | x)} [\tilde{r}(x, \tau_n) \log \pi(\tau_n | x; \theta)] \quad (8)$$

204 is  $O(|C_1| + C_2)$ . While  $C_2$  can be large, because it depends on the ratios of propensity scores, this  
 205 factor is comparable to Lemma 1. Specifically, the factor of  $C_1$  is stated in Lemma 1 and the key step  
 206 in deriving the lower bound is that  $u \geq 1 + \log u$  for  $u = \pi(\tau_n | x; \theta)/\pi_0(\tau_n | x)$ . The only major  
 207 difference from Lemma 1 is that we do not get a proper lower bound. Using the same reasoning as in  
 208 Section 3.1, maximization of (8) is equivalent to SFT on  $n$  data points  $(a_t, x, \tau_{t-1})$  weighted by the



209 standardized trajectory reward  $\tilde{r}(x, \tau_n)$ . The terms are correlated because they belong to the same  
 210 trajectory and are weighted by the same reward.

211 We implement the optimization of (8) using Algorithm 1. The only difference is that the rewards are  
 212 standardized and thus we call this method standardized reward-weighted fine-tuning (**SWiFt**). The  
 213 logged dataset  $\mathcal{D} = \{(x, \tau_n, \tilde{r})\}$  is generated as follows. First, we sample  $x$ . Second, we sample  $m$   
 214 trajectories  $\tau_{n,i} \sim \pi_0(\cdot | x)$  for  $i \in [m]$  and compute their rewards  $r(x, \tau_{n,i})$ . Third, we estimate the  
 215 mean reward  $\mu(x)$  and the standard deviation of rewards  $\sigma(x)$  as

$$\hat{\mu}(x) = \frac{1}{m} \sum_{i=1}^m r(x, \tau_{n,i}), \quad \hat{\sigma}(x) = \sqrt{\frac{1}{m-1} \sum_{i=1}^m (r(x, \tau_{n,i}) - \hat{\mu}(x))^2},$$

216 respectively. Finally, we standardize all rewards as  $\tilde{r}(x, \tau_{n,i}) = (r(x, \tau_{n,i}) - \hat{\mu}(x)) / \hat{\sigma}(x)$  and add  
 217 all  $(x, \tau_{n,i}, \tilde{r}(x, \tau_{n,i}))$  to the dataset. The cost of the standardization, computing  $\hat{\mu}(x)$  and  $\hat{\sigma}(x)$ , is  
 218  $O(mn)$ . This is the same cost as sampling  $m$  trajectories of length  $n$ , and thus negligible.

## 219 4 Experiments

220 We evaluate our methods on six datasets: OpenBookQA [43], ARC [16], SciQA [68], and MMLU  
 221 [24] are standard QA benchmarks; and we convert the text-to-SQL conversation dataset CoSQL [70]  
 222 and math tutoring dataset MathDial [41] into a QA-style conversational dataset. These benchmarks  
 223 cover a variety of domains and show that our methods learn better policies in most cases. We describe  
 224 the benchmarks in more detail in Appendix C and show prompt examples in Appendix D.

225 We generate 500 tasks for each benchmark and report average performance over the tasks in each  
 226 benchmark. The agent tries to solve each task in  $n = 3$  steps. The user is designed as follows: it asks  
 227 the agent to solve the problem in step 1, encourages it to think deeper in step 2, and asks for a final  
 228 answer in step 3. This follows an established evaluation protocol [55, 19]. We experiment with both  
 229 thinking and standard modes. In the *thinking mode*, we ask the agent to answer and give reasoning  
 230 for the answer within <thinking> tags. In the *standard mode*, we just ask the agent to answer. The  
 231 agent is implemented using Llama-3.1-8B-Instruct. We state the model and training parameters in  
 232 detail in Appendix G. We solve each task 3 times with different temperatures. The three runs are used  
 233 for reward standardization in **SWiFt**, and also to implement the methods of Andukuri et al. [2] and  
 234 Chen et al. [13]. We ablate the number of optimized steps  $n$  in Appendix E.

235 We report multiple metrics. The *most fundamental* measure of performance is *Accuracy*, which is  
 236 the proportion of questions whose answers match the correct (gold standard) answer. We report the  
 237 percentage of times that the model outputs <thinking> tags as *Thinking*. This shows how well the  
 238 model follows reasoning instructions. We also report six *reward metrics* assigned to the responses by  
 239 GPT-4o based on how good the conversation is: **1. Overall**: A summary of the remaining 5 scores.  
 240 **2. Accuracy**: Did the agent select the correct answer? **3. Reasoning Ability**: Was the reasoning  
 241 logical, clear, and precise? **4. Comprehensiveness**: Were alternative options properly addressed? **5.**  
 242 **Pedagogical Value**: Would this explanation help someone learn? **6. Confidence Calibration**: Was the  
 243 agent’s confidence in giving the final answer appropriate? The overall reward is used as the reward in  
 244 all RL algorithms and we rescale it from  $[0, 10]$  to  $[0, 1]$  for training. These are denoted as R Overall -  
 245 R Confidence in the Table 1-12.

246 We consider five baselines. The first baseline is the original policy, and we call it **Base**. We expect  
 247 to outperform **Base** due to learning. All other baselines are offline RL algorithms. To have a fair  
 248 comparison, we use the same dataset of sampled trajectories in all of them. The only difference is in  
 249 how the dataset is used. **STaR-GATE** [2] learns policies by supervised fine-tuning on most rewarding  
 250 trajectories. This is akin to reward signal thresholding, into the trajectories used for learning and not.  
 251 We improve this baseline by distillation, as done in Andukuri et al. [2], and call it **STaR-GATE-D**. The  
 252 fourth baseline is motivated by Chen et al. [13]. The key idea in Chen et al. [13] is to generate a new  
 253 trajectory in each step of the original trajectories, and then determine winning and losing actions in  
 254 that step based on the corresponding trajectory reward. After this, DPO is used to learn the winning  
 255 actions. We call this baseline **StepDPO**. The main limitation of **STaR-GATE** and **StepDPO** is that they  
 256 do not fully utilize the reward signal; they only use it to turn the original problem into an SFT or  
 257 DPO problem. We directly optimize for rewards using RL. The last baseline is **DPO**, where the final  
 258 winning and losing responses are used to solve the original problem without asking any questions.

Table 1: Model Performance Comparison - Thinking Mode (ARC)

| Model               | Accuracy               | Thinking (%)      | R Overall          | R Accuracy         | R Reasoning        | R Comprehensive    | R Pedagogic        | R Confidence       |
|---------------------|------------------------|-------------------|--------------------|--------------------|--------------------|--------------------|--------------------|--------------------|
| <b>SWiFt</b> (ours) | <b>0.7993 ± 0.0236</b> | <b>97.9 ± 0.0</b> | <b>7.19 ± 0.14</b> | <b>8.12 ± 0.17</b> | <b>7.46 ± 0.12</b> | <b>6.60 ± 0.11</b> | <b>6.95 ± 0.13</b> | <b>7.75 ± 0.17</b> |
| <b>ReFit</b> (ours) | 0.7889 ± 0.0240        | <b>97.9 ± 0.0</b> | 7.12 ± 0.14        | 8.03 ± 0.17        | 7.37 ± 0.13        | 6.56 ± 0.11        | 6.88 ± 0.14        | 7.66 ± 0.18        |
| DPO                 | 0.6471 ± 0.0281        | 8.7 ± 0.0         | 5.72 ± 0.18        | 6.84 ± 0.22        | 6.05 ± 0.16        | 5.30 ± 0.15        | 5.21 ± 0.17        | 6.02 ± 0.21        |
| STaR-GATE           | 0.6990 ± 0.0270        | <u>90.0 ± 0.0</u> | 6.67 ± 0.17        | 7.48 ± 0.20        | 6.94 ± 0.16        | 6.22 ± 0.14        | 6.50 ± 0.16        | 7.11 ± 0.21        |
| Base                | 0.3772 ± 0.0146        | 75.1 ± 0.0        | 6.47 ± 0.12        | 7.32 ± 0.14        | 6.56 ± 0.11        | 5.80 ± 0.09        | 6.40 ± 0.11        | 6.92 ± 0.16        |
| STaR-GATE-D         | 0.7578 ± 0.0252        | 23.9 ± 0.0        | 5.47 ± 0.16        | 6.99 ± 0.20        | 5.65 ± 0.16        | 4.83 ± 0.14        | 4.74 ± 0.16        | 5.95 ± 0.19        |
| StepDPO             | 0.6401 ± 0.0282        | 8.0 ± 0.0         | 5.46 ± 0.18        | 6.60 ± 0.22        | 5.76 ± 0.17        | 5.04 ± 0.15        | 4.88 ± 0.17        | 5.83 ± 0.21        |

Table 2: Model Performance Comparison - Thinking Mode (MMLU)

| Model               | Accuracy               | Thinking (%)      | R Overall          | R Accuracy         | R Reasoning        | R Comprehensive    | R Pedagogic        | R Confidence       |
|---------------------|------------------------|-------------------|--------------------|--------------------|--------------------|--------------------|--------------------|--------------------|
| <b>SWiFt</b> (ours) | 0.7032 ± 0.0367        | 97.4 ± 0.0        | 5.59 ± 0.22        | 6.42 ± 0.26        | 5.94 ± 0.20        | 5.10 ± 0.18        | 5.23 ± 0.20        | 6.14 ± 0.26        |
| <b>ReFit</b> (ours) | <b>0.7097 ± 0.0365</b> | <b>98.1 ± 0.0</b> | 5.59 ± 0.22        | 6.43 ± 0.26        | 5.94 ± 0.20        | 5.06 ± 0.18        | 5.19 ± 0.20        | 6.11 ± 0.26        |
| DPO                 | 0.6387 ± 0.0386        | 7.1 ± 0.0         | 4.77 ± 0.23        | 5.71 ± 0.29        | 5.09 ± 0.22        | 4.35 ± 0.20        | 4.24 ± 0.22        | 5.07 ± 0.28        |
| STaR-GATE           | 0.6000 ± 0.0393        | 81.3 ± 0.0        | 5.34 ± 0.24        | 5.91 ± 0.29        | 5.70 ± 0.22        | 4.98 ± 0.20        | 5.15 ± 0.22        | 5.63 ± 0.29        |
| Base                | 0.2774 ± 0.0127        | 53.5 ± 0.0        | <b>5.87 ± 0.16</b> | <b>6.57 ± 0.20</b> | <b>6.03 ± 0.15</b> | <b>5.19 ± 0.14</b> | <b>5.97 ± 0.15</b> | <b>6.19 ± 0.22</b> |
| STaR-GATE-D         | 0.5548 ± 0.0399        | 25.2 ± 0.0        | 4.23 ± 0.23        | 4.96 ± 0.28        | 4.57 ± 0.22        | 3.93 ± 0.20        | 3.77 ± 0.21        | 4.34 ± 0.27        |
| StepDPO             | 0.6387 ± 0.0386        | 5.2 ± 0.0         | 4.94 ± 0.23        | 5.88 ± 0.28        | 5.26 ± 0.21        | 4.50 ± 0.20        | 4.45 ± 0.22        | 5.31 ± 0.28        |

Table 3: Model Performance Comparison - Thinking Mode (OpenBookQA)

| Model               | Accuracy               | Thinking (%)      | R Overall          | R Accuracy         | R Reasoning        | R Comprehensive    | R Pedagogic        | R Confidence       |
|---------------------|------------------------|-------------------|--------------------|--------------------|--------------------|--------------------|--------------------|--------------------|
| <b>SWiFt</b> (ours) | 0.6814 ± 0.0310        | <b>96.5 ± 0.0</b> | <b>6.16 ± 0.21</b> | <b>6.86 ± 0.24</b> | <b>6.49 ± 0.19</b> | <b>5.89 ± 0.15</b> | <b>5.99 ± 0.19</b> | <b>6.52 ± 0.25</b> |
| <b>ReFit</b> (ours) | 0.6504 ± 0.0317        | <b>96.5 ± 0.0</b> | 5.84 ± 0.22        | 6.63 ± 0.26        | 6.12 ± 0.21        | 5.58 ± 0.17        | 5.62 ± 0.21        | 6.25 ± 0.26        |
| DPO                 | 0.6195 ± 0.0323        | 10.6 ± 0.0        | 5.09 ± 0.21        | 6.21 ± 0.27        | 5.35 ± 0.20        | 4.82 ± 0.18        | 4.47 ± 0.20        | 5.55 ± 0.25        |
| STaR-GATE           | 0.6549 ± 0.0316        | 92.5 ± 0.0        | 6.01 ± 0.21        | 6.68 ± 0.25        | 6.35 ± 0.20        | 5.80 ± 0.16        | 5.78 ± 0.20        | 6.36 ± 0.26        |
| Base                | 0.3628 ± 0.0175        | 74.3 ± 0.0        | 5.99 ± 0.15        | 6.77 ± 0.19        | 6.15 ± 0.14        | 5.43 ± 0.12        | 5.95 ± 0.14        | 6.31 ± 0.20        |
| STaR-GATE-D         | <b>0.6903 ± 0.0308</b> | 20.8 ± 0.0        | 5.21 ± 0.19        | 6.64 ± 0.25        | 5.40 ± 0.18        | 4.73 ± 0.16        | 4.35 ± 0.17        | 5.70 ± 0.23        |
| StepDPO             | 0.6106 ± 0.0324        | 11.5 ± 0.0        | 4.90 ± 0.21        | 6.14 ± 0.27        | 5.06 ± 0.20        | 4.56 ± 0.18        | 4.29 ± 0.20        | 5.33 ± 0.25        |

This baseline shows what can be attained without having a conversation. Our algorithms **ReFit** and **SWiFt** are implemented as described in Section 3. We expect **SWiFt** to outperform **ReFit** because reward-based learning tends to be sensitive to the scale of rewards [61, 5, 47], which motivates our algorithm and theory for standardized rewards (Section 3.3).

**Results.** We report our results on all six benchmarks in Tables 1-12, in both thinking and standard modes. The best result is highlighted in **bold** and the second best result is underlined. The confidence intervals are standard errors of the estimates. The training times of all RL methods are comparable because they are trained on datasets of similar sizes and using the same architecture.

We observe the following trends. First, in terms of accuracy, **SWiFt** wins in 7 experiments out of 12 and is among the best two methods in 10 experiments out of 12. Although **SWiFt** maximizes the overall reward, it performs extremely well in the remaining 5 reward metrics. In particular, most of its reward metrics are among the top two in 9 experiments out of 12. **ReFit** performs significantly worse than **SWiFt** in 3 experiments: thinking OpenBookQA, standard MMLU, and standard CoSQL. Overall, though, it is among the best two methods in 9 experiments out of 12. We believe that this is because SFT in TRL [64] is implemented by adaptive optimizers [30], which adapt to the scale of the gradient and thus partially mitigate poorly scaled rewards.

The best two baselines are **STaR-GATE** and **STaR-GATE-D**. This shows the robustness of RL through SFT, the key idea in Andukuri et al. [2], which can be further improved by distillation. As discussed earlier, our work can be viewed refining this idea, where we weight the SFT update by the actual reward of the trajectory instead of an indicator of having a high reward (Section 3.1). The advantage of our formulation is that it has no additional hyperparameter that decides which trajectories have high rewards, and can be properly related to the original objective (Lemma 1) and its standardization (Lemma 3). The worst baseline is **Base** and this shows the value of learning to clarify. We also show radar plots in Appendix F. We applied UMAP [42] dimensionality reduction to visualize how **Base** and **SWiFt** differ in their responses in Appendix H.

## 5 Related Work

We briefly review related work in three paragraphs, corresponding to supervised learning, classic RL, and RL with large language models. A more detailed review is in Appendix B.

Table 4: Model Performance Comparison - Thinking Mode (SciQA)

| Model        | Accuracy               | Thinking (%)      | R Overall          | R Accuracy         | R Reasoning        | R Comprehensive    | R Pedagogic        | R Confidence       |
|--------------|------------------------|-------------------|--------------------|--------------------|--------------------|--------------------|--------------------|--------------------|
| SWiFt (ours) | <b>0.9248 ± 0.0175</b> | <b>99.1 ± 0.0</b> | 7.61 ± 0.12        | 8.84 ± 0.14        | 7.73 ± 0.11        | 6.76 ± 0.10        | 7.11 ± 0.13        | <b>8.45 ± 0.15</b> |
| ReFit (ours) | 0.9159 ± 0.0185        | 96.0 ± 0.0        | <b>7.64 ± 0.12</b> | <b>8.87 ± 0.14</b> | <b>7.76 ± 0.11</b> | <b>6.81 ± 0.10</b> | <b>7.13 ± 0.12</b> | 8.43 ± 0.15        |
| DPO          | 0.7920 ± 0.0270        | 5.8 ± 0.0         | 5.96 ± 0.18        | 7.61 ± 0.22        | 6.08 ± 0.18        | 5.29 ± 0.16        | 5.14 ± 0.18        | 6.50 ± 0.22        |
| STaR-GATE    | 0.8186 ± 0.0256        | 90.3 ± 0.0        | 7.08 ± 0.18        | 8.17 ± 0.21        | 7.27 ± 0.16        | 6.49 ± 0.14        | 6.69 ± 0.17        | 7.69 ± 0.21        |
| Base         | 0.4956 ± 0.0076        | 73.5 ± 0.0        | 7.00 ± 0.10        | 8.12 ± 0.11        | 7.03 ± 0.10        | 6.11 ± 0.09        | 6.84 ± 0.11        | 7.78 ± 0.13        |
| STaR-GATE-D  | 0.9027 ± 0.0197        | 21.7 ± 0.0        | 6.58 ± 0.16        | 8.19 ± 0.18        | 6.72 ± 0.16        | 5.78 ± 0.14        | 5.73 ± 0.17        | 7.24 ± 0.18        |
| StepDPO      | 0.8186 ± 0.0256        | 7.5 ± 0.0         | 6.29 ± 0.18        | 7.87 ± 0.21        | 6.36 ± 0.18        | 5.57 ± 0.16        | 5.42 ± 0.18        | 6.89 ± 0.22        |

Table 5: Model Performance Comparison - Thinking Mode (CoSQL)

| Model        | Accuracy               | Thinking (%)      | R Overall          | R Accuracy         | R Reasoning        | R Comprehensive    | R Pedagogic        | R Confidence       |
|--------------|------------------------|-------------------|--------------------|--------------------|--------------------|--------------------|--------------------|--------------------|
| SWiFt (ours) | <b>0.6500 ± 0.0435</b> | 96.7 ± 0.0        | 4.87 ± 0.21        | 5.56 ± 0.27        | 5.26 ± 0.19        | 4.62 ± 0.15        | 4.23 ± 0.16        | 5.22 ± 0.29        |
| ReFit (ours) | <b>0.6500 ± 0.0435</b> | <b>99.2 ± 0.0</b> | 4.91 ± 0.21        | 5.52 ± 0.27        | 5.28 ± 0.18        | 4.63 ± 0.15        | 4.22 ± 0.17        | 5.39 ± 0.31        |
| DPO          | 0.5167 ± 0.0456        | 60.0 ± 0.0        | 4.34 ± 0.19        | 4.85 ± 0.25        | 4.72 ± 0.17        | 4.27 ± 0.15        | 4.00 ± 0.16        | 4.29 ± 0.28        |
| STaR-GATE    | 0.6167 ± 0.0444        | 90.0 ± 0.0        | 5.28 ± 0.24        | 5.78 ± 0.30        | 5.51 ± 0.22        | <b>5.19 ± 0.16</b> | 4.90 ± 0.20        | 5.54 ± 0.33        |
| Base         | 0.2000 ± 0.0143        | 65.8 ± 0.0        | <b>5.65 ± 0.17</b> | <b>6.17 ± 0.22</b> | <b>5.88 ± 0.15</b> | 5.16 ± 0.13        | <b>5.84 ± 0.15</b> | <b>5.87 ± 0.27</b> |
| STaR-GATE-D  | 0.4917 ± 0.0456        | 57.5 ± 0.0        | 3.94 ± 0.17        | 4.49 ± 0.22        | 4.45 ± 0.16        | 3.89 ± 0.14        | 3.58 ± 0.15        | 3.74 ± 0.25        |
| StepDPO      | 0.5250 ± 0.0456        | 60.0 ± 0.0        | 4.37 ± 0.20        | 4.82 ± 0.26        | 4.81 ± 0.18        | 4.26 ± 0.15        | 4.08 ± 0.18        | 4.38 ± 0.29        |

Table 6: Model Performance Comparison - Thinking Mode (MathDial)

| Model        | Accuracy               | Thinking (%)       | R Overall          | R Accuracy         | R Reasoning        | R Comprehensive    | R Pedagogic        | R Confidence       |
|--------------|------------------------|--------------------|--------------------|--------------------|--------------------|--------------------|--------------------|--------------------|
| SWiFt (ours) | <b>0.1933 ± 0.0228</b> | 99.3 ± 0.0         | 1.88 ± 0.07        | 1.91 ± 0.07        | 2.42 ± 0.07        | 2.15 ± 0.07        | 1.83 ± 0.07        | 1.61 ± 0.09        |
| ReFit (ours) | 0.0867 ± 0.0162        | <b>100.0 ± 0.0</b> | 2.38 ± 0.07        | 2.33 ± 0.07        | 3.13 ± 0.08        | 2.56 ± 0.08        | 2.43 ± 0.07        | <b>1.63 ± 0.07</b> |
| DPO          | 0.1467 ± 0.0204        | 25.0 ± 0.0         | 1.61 ± 0.05        | 1.63 ± 0.06        | 2.23 ± 0.05        | 1.78 ± 0.07        | 1.56 ± 0.05        | 1.40 ± 0.06        |
| STaR-GATE    | 0.0467 ± 0.0122        | <b>100.0 ± 0.0</b> | <b>2.46 ± 0.06</b> | <b>2.40 ± 0.07</b> | <b>3.28 ± 0.07</b> | <b>2.65 ± 0.07</b> | <b>2.45 ± 0.07</b> | 1.53 ± 0.05        |
| Base         | 0.0000 ± 0.0212        | 87.7 ± 0.0         | 2.01 ± 0.06        | 2.28 ± 0.07        | 2.67 ± 0.07        | 1.77 ± 0.05        | 2.20 ± 0.07        | 1.39 ± 0.09        |
| STaR-GATE-D  | 0.1167 ± 0.0185        | 95.0 ± 0.0         | 1.69 ± 0.06        | 1.71 ± 0.06        | 2.30 ± 0.07        | 1.81 ± 0.06        | 1.63 ± 0.06        | 1.35 ± 0.06        |
| StepDPO      | 0.1467 ± 0.0204        | 25.7 ± 0.0         | 1.58 ± 0.05        | 1.61 ± 0.06        | 2.21 ± 0.06        | 1.72 ± 0.06        | 1.53 ± 0.05        | 1.40 ± 0.06        |

Table 7: Model Performance Comparison - Standard Mode (ARC)

| Model        | Accuracy               | Thinking (%) | R Overall          | R Accuracy         | R Reasoning        | R Comprehensive    | R Pedagogic        | R Confidence       |
|--------------|------------------------|--------------|--------------------|--------------------|--------------------|--------------------|--------------------|--------------------|
| SWiFt (ours) | 0.7778 ± 0.0289        | 0.0 ± 0.0    | 7.26 ± 0.19        | 8.04 ± 0.22        | 7.51 ± 0.17        | 6.76 ± 0.14        | 7.12 ± 0.18        | 7.82 ± 0.23        |
| ReFit (ours) | 0.7729 ± 0.0291        | 0.0 ± 0.0    | 7.23 ± 0.19        | 7.98 ± 0.22        | 7.44 ± 0.18        | 6.80 ± 0.14        | 7.03 ± 0.18        | 7.66 ± 0.23        |
| DPO          | 0.6377 ± 0.0334        | 0.0 ± 0.0    | 5.68 ± 0.20        | 6.51 ± 0.25        | 6.06 ± 0.18        | 5.41 ± 0.16        | 5.26 ± 0.19        | 5.78 ± 0.25        |
| STaR-GATE    | <b>0.7971 ± 0.0280</b> | 0.0 ± 0.0    | <b>7.49 ± 0.18</b> | <b>8.25 ± 0.21</b> | <b>7.67 ± 0.17</b> | <b>6.93 ± 0.14</b> | <b>7.36 ± 0.17</b> | <b>8.02 ± 0.22</b> |
| Base         | 0.5652 ± 0.0142        | 0.0 ± 0.0    | 6.87 ± 0.14        | 7.68 ± 0.18        | 6.97 ± 0.13        | 6.25 ± 0.11        | 6.75 ± 0.14        | 7.21 ± 0.20        |
| STaR-GATE-D  | 0.7101 ± 0.0315        | 0.0 ± 0.0    | 5.95 ± 0.18        | 6.96 ± 0.22        | 6.29 ± 0.17        | 5.56 ± 0.14        | 5.42 ± 0.17        | 6.18 ± 0.22        |
| StepDPO      | 0.6280 ± 0.0336        | 0.0 ± 0.0    | 5.76 ± 0.20        | 6.55 ± 0.25        | 6.19 ± 0.18        | 5.54 ± 0.15        | 5.43 ± 0.19        | 5.84 ± 0.25        |

Table 8: Model Performance Comparison - Standard Mode (MMLU)

| Model        | Accuracy               | Thinking (%) | R Overall          | R Accuracy         | R Reasoning        | R Comprehensive    | R Pedagogic        | R Confidence       |
|--------------|------------------------|--------------|--------------------|--------------------|--------------------|--------------------|--------------------|--------------------|
| SWiFt (ours) | <b>0.7218 ± 0.0389</b> | 0.0 ± 0.0    | <b>6.08 ± 0.25</b> | <b>6.88 ± 0.29</b> | <b>6.32 ± 0.23</b> | <b>5.50 ± 0.21</b> | 5.80 ± 0.23        | <b>6.71 ± 0.30</b> |
| ReFit (ours) | 0.6917 ± 0.0400        | 0.0 ± 0.0    | 5.93 ± 0.26        | 6.72 ± 0.31        | 6.23 ± 0.24        | 5.42 ± 0.21        | 5.56 ± 0.25        | 6.36 ± 0.31        |
| DPO          | 0.5489 ± 0.0431        | 0.0 ± 0.0    | 4.86 ± 0.25        | 5.52 ± 0.31        | 5.30 ± 0.23        | 4.61 ± 0.21        | 4.56 ± 0.23        | 4.92 ± 0.30        |
| STaR-GATE    | 0.6842 ± 0.0403        | 0.0 ± 0.0    | 5.93 ± 0.26        | 6.68 ± 0.31        | 6.20 ± 0.25        | 5.41 ± 0.22        | 5.59 ± 0.25        | 6.41 ± 0.31        |
| Base         | 0.3008 ± 0.0165        | 0.0 ± 0.0    | <b>5.97 ± 0.19</b> | <b>6.74 ± 0.23</b> | 6.16 ± 0.18        | 5.32 ± 0.16        | <b>5.95 ± 0.18</b> | 6.11 ± 0.26        |
| STaR-GATE-D  | 0.5940 ± 0.0426        | 0.0 ± 0.0    | 4.98 ± 0.25        | 5.75 ± 0.30        | 5.29 ± 0.24        | 4.65 ± 0.21        | 4.53 ± 0.24        | 5.26 ± 0.31        |
| StepDPO      | 0.5263 ± 0.0433        | 0.0 ± 0.0    | 4.77 ± 0.26        | 5.44 ± 0.32        | 5.17 ± 0.25        | 4.49 ± 0.22        | 4.38 ± 0.23        | 4.94 ± 0.31        |

Table 9: Model Performance Comparison - Standard Mode (OpenBookQA)

| Model        | Accuracy               | Thinking (%) | R Overall          | R Accuracy         | R Reasoning        | R Comprehensive    | R Pedagogic        | R Confidence       |
|--------------|------------------------|--------------|--------------------|--------------------|--------------------|--------------------|--------------------|--------------------|
| SWiFt (ours) | <b>0.7662 ± 0.0299</b> | 0.0 ± 0.0    | <b>6.85 ± 0.21</b> | <b>7.73 ± 0.24</b> | <b>7.09 ± 0.19</b> | <b>6.42 ± 0.15</b> | <b>6.59 ± 0.20</b> | <b>7.45 ± 0.25</b> |
| ReFit (ours) | 0.7562 ± 0.0303        | 0.0 ± 0.0    | 6.73 ± 0.21        | 7.66 ± 0.25        | 6.96 ± 0.20        | 6.29 ± 0.16        | 6.43 ± 0.21        | 7.25 ± 0.25        |
| DPO          | 0.5025 ± 0.0353        | 0.0 ± 0.0    | 4.95 ± 0.21        | 5.49 ± 0.26        | 5.43 ± 0.19        | 5.04 ± 0.16        | 4.66 ± 0.20        | 4.95 ± 0.26        |
| STaR-GATE    | 0.7512 ± 0.0305        | 0.0 ± 0.0    | 6.69 ± 0.22        | 7.54 ± 0.25        | 6.96 ± 0.20        | 6.27 ± 0.16        | 6.50 ± 0.21        | 7.23 ± 0.26        |
| Base         | 0.4328 ± 0.0180        | 0.0 ± 0.0    | 6.22 ± 0.16        | 6.95 ± 0.21        | 6.37 ± 0.15        | 5.65 ± 0.13        | 6.12 ± 0.15        | 6.51 ± 0.21        |
| STaR-GATE-D  | 0.7114 ± 0.0320        | 0.0 ± 0.0    | 5.84 ± 0.19        | 6.96 ± 0.24        | 6.21 ± 0.18        | 5.52 ± 0.15        | 5.24 ± 0.18        | 6.21 ± 0.23        |
| StepDPO      | 0.5174 ± 0.0352        | 0.0 ± 0.0    | 4.92 ± 0.22        | 5.54 ± 0.27        | 5.36 ± 0.20        | 4.97 ± 0.17        | 4.65 ± 0.20        | 4.97 ± 0.27        |

**Supervised learning.** Many works have focused on clarifying user prompts by asking clarifying questions [39, 72]. Notably, Zelikman et al. [72] proposed a simple yet impactful approach: learning from rationales for successes and regenerated failures. The problem of whether to ask a clarifying question has also been studied extensively [40, 9, 36], giving rise to new benchmarks [9, 75] and surveys [46, 74]. These studies have also been extended to vision-language models [23, 63, 12]. In contrast to these works, we take an RL approach.



Table 10: Model Performance Comparison - Standard Mode (SciQA)

| Model               | Accuracy               | Thinking (%) | R Overall          | R Accuracy         | R Reasoning        | R Comprehensive    | R Pedagogic        | R Confidence       |
|---------------------|------------------------|--------------|--------------------|--------------------|--------------------|--------------------|--------------------|--------------------|
| <b>SWiFt</b> (ours) | <b>0.9502 ± 0.0153</b> | 0.0 ± 0.0    | <b>8.04 ± 0.12</b> | <b>9.13 ± 0.13</b> | <b>8.12 ± 0.11</b> | 7.17 ± 0.10        | <b>7.71 ± 0.13</b> | <b>8.88 ± 0.15</b> |
| <b>ReFit</b> (ours) | 0.9453 ± 0.0160        | 0.0 ± 0.0    | 8.04 ± 0.12        | 9.08 ± 0.14        | 8.11 ± 0.11        | <b>7.20 ± 0.10</b> | 7.69 ± 0.13        | 8.87 ± 0.15        |
| DPO                 | 0.7612 ± 0.0301        | 0.0 ± 0.0    | 6.41 ± 0.19        | 7.44 ± 0.23        | 6.72 ± 0.17        | 6.00 ± 0.15        | 6.02 ± 0.19        | 6.78 ± 0.23        |
| STaR-GATE           | 0.9005 ± 0.0211        | 0.0 ± 0.0    | 7.85 ± 0.16        | 8.88 ± 0.18        | 7.98 ± 0.14        | 7.06 ± 0.13        | 7.52 ± 0.16        | 8.62 ± 0.19        |
| Base                | 0.6517 ± 0.0086        | 0.0 ± 0.0    | 7.48 ± 0.10        | 8.56 ± 0.11        | 7.52 ± 0.10        | 6.55 ± 0.09        | 7.34 ± 0.10        | 8.10 ± 0.13        |
| STaR-GATE-D         | 0.9005 ± 0.0211        | 0.0 ± 0.0    | 6.90 ± 0.15        | 8.39 ± 0.17        | 7.13 ± 0.14        | 6.20 ± 0.13        | 6.03 ± 0.16        | 7.42 ± 0.18        |
| StepDPO             | 0.7463 ± 0.0307        | 0.0 ± 0.0    | 6.23 ± 0.20        | 7.25 ± 0.24        | 6.52 ± 0.19        | 5.88 ± 0.16        | 5.78 ± 0.19        | 6.53 ± 0.25        |

Table 11: Model Performance Comparison - Standard Mode (CoSQL)

| Model               | Accuracy               | Thinking (%) | R Overall          | R Accuracy         | R Reasoning        | R Comprehensive    | R Pedagogic        | R Confidence       |
|---------------------|------------------------|--------------|--------------------|--------------------|--------------------|--------------------|--------------------|--------------------|
| <b>SWiFt</b> (ours) | <b>0.6583 ± 0.0433</b> | 0.0 ± 0.0    | <b>5.45 ± 0.24</b> | <b>5.97 ± 0.30</b> | <b>5.72 ± 0.22</b> | <b>5.28 ± 0.17</b> | 4.95 ± 0.21        | <b>5.85 ± 0.33</b> |
| <b>ReFit</b> (ours) | 0.6250 ± 0.0442        | 0.0 ± 0.0    | 5.16 ± 0.24        | 5.64 ± 0.30        | 5.47 ± 0.22        | 4.99 ± 0.18        | 4.72 ± 0.20        | 5.52 ± 0.32        |
| DPO                 | 0.2833 ± 0.0411        | 0.0 ± 0.0    | 4.19 ± 0.20        | 4.37 ± 0.25        | 4.79 ± 0.19        | 4.49 ± 0.15        | 4.13 ± 0.17        | 3.69 ± 0.27        |
| STaR-GATE           | 0.6083 ± 0.0446        | 0.0 ± 0.0    | 5.34 ± 0.25        | 5.81 ± 0.31        | 5.65 ± 0.23        | 5.26 ± 0.18        | 4.99 ± 0.22        | 5.57 ± 0.34        |
| Base                | 0.1250 ± 0.0117        | 0.0 ± 0.0    | 5.38 ± 0.16        | 5.88 ± 0.22        | 5.66 ± 0.15        | 4.92 ± 0.12        | <b>5.49 ± 0.14</b> | 5.13 ± 0.24        |
| STaR-GATE-D         | 0.2083 ± 0.0371        | 0.0 ± 0.0    | 3.62 ± 0.19        | 3.82 ± 0.23        | 4.25 ± 0.18        | 4.02 ± 0.16        | 3.73 ± 0.17        | 3.03 ± 0.26        |
| StepDPO             | 0.2917 ± 0.0415        | 0.0 ± 0.0    | 4.21 ± 0.20        | 4.45 ± 0.26        | 4.85 ± 0.18        | 4.50 ± 0.15        | 4.10 ± 0.17        | 3.73 ± 0.28        |

Table 12: Model Performance Comparison - Standard Mode (MathDial)

| Model               | Accuracy               | Thinking (%) | R Overall          | R Accuracy         | R Reasoning        | R Comprehensive    | R Pedagogic        | R Confidence       |
|---------------------|------------------------|--------------|--------------------|--------------------|--------------------|--------------------|--------------------|--------------------|
| <b>SWiFt</b> (ours) | 0.0967 ± 0.0171        | 0.0 ± 0.0    | 2.43 ± 0.07        | 2.41 ± 0.07        | 3.09 ± 0.08        | <b>2.68 ± 0.07</b> | <b>2.45 ± 0.07</b> | <b>1.66 ± 0.07</b> |
| <b>ReFit</b> (ours) | 0.0600 ± 0.0137        | 0.0 ± 0.0    | <b>2.43 ± 0.07</b> | <b>2.50 ± 0.08</b> | <b>3.15 ± 0.08</b> | 2.68 ± 0.07        | 2.41 ± 0.08        | 1.63 ± 0.07        |
| DPO                 | <b>0.2100 ± 0.0235</b> | 0.0 ± 0.0    | 1.85 ± 0.06        | 1.90 ± 0.07        | 2.41 ± 0.06        | 2.00 ± 0.07        | 1.77 ± 0.06        | 1.58 ± 0.07        |
| STaR-GATE           | 0.1067 ± 0.0178        | 0.0 ± 0.0    | 2.29 ± 0.07        | 2.25 ± 0.07        | 2.94 ± 0.08        | 2.58 ± 0.08        | 2.30 ± 0.07        | 1.56 ± 0.07        |
| Base                | 0.0000 ± 0.0168        | 0.0 ± 0.0    | 1.90 ± 0.06        | 2.20 ± 0.07        | 2.54 ± 0.07        | 1.81 ± 0.05        | 2.01 ± 0.07        | 1.20 ± 0.08        |
| STaR-GATE-D         | 0.2000 ± 0.0231        | 0.0 ± 0.0    | 1.55 ± 0.04        | 1.63 ± 0.05        | 1.95 ± 0.05        | 1.79 ± 0.06        | 1.51 ± 0.04        | 1.31 ± 0.05        |
| StepDPO             | 0.2067 ± 0.0234        | 0.0 ± 0.0    | 1.86 ± 0.06        | 1.87 ± 0.06        | 2.43 ± 0.06        | 2.03 ± 0.07        | 1.78 ± 0.06        | 1.55 ± 0.06        |

**Classic RL.** Conversation optimization using offline RL is a classic topic and has been reviewed in Section 6.6 of Levine et al. [35]. As an example, Zhou et al. [78] proposed both online and offline policy gradients for improving language quality. Neither this approach nor other approaches based on classic RL primitives, such as Q functions [67, 45], can be directly applied to LLMs.

**RL with LLMs.** The closest related works are Andukuri et al. [2] and Chen et al. [13], both of which use RL to learn clarifying questions from simulated conversations. While we adopt the same learning paradigm, we differ in how it is used. Andukuri et al. [2] choose the most rewarding trajectories and fine-tune on them. Chen et al. [13] generate alternative responses for each step of the conversation and then optimize for better responses using DPO [50]. The main difference in our work is that we optimize directly for the reward.

## 6 Conclusions

The emergence of LLMs [49, 8, 6] led to a major interest in QA agents and many methods have been proposed (Section 5). In this work, we learn to ask clarifying questions by RL. To make it practical, we derive an offline variant of the problem, which can be viewed as weighted supervised fine-tuning and thus easily implemented in any LLM. We further derive an offline objective with standardized rewards, which could lower variance in policy optimization. Our approach stands in a stark contrast to recently proposed methods, based on SFT and direct preference optimization, which have extra hyper-parameters and do not directly optimize rewards. We improve over them in experiments.

**Limitations.** The computational cost of RL tends to be much higher than that of supervised learning. We address this issue partially by proposing a reduction of offline RL to SFT, which is a supervised learning technique. In addition, the quality of the logged dataset is critical for offline RL. However, we do not make any attempt to improve it and instead rely on a popular technique to obtain a diverse dataset: simulate conversation trajectories using different temperatures in the LLM.

**Future work.** We note that our proposed algorithms **ReFit** and **SWiFt** are general, and hence can be applied to other domains than QA. We focused on QA due to many established benchmarks and baselines in this domain, which allow us to showcase the benefit of directly optimizing rewards.

## References

- [1] V. M. Aleksandrov, V. I. Sysoyev, and V. V. Shemenewa. Stochastic optimization. *Engineering Cybernetics*, 5:11–16, 1968.
- [2] Chinmaya Andukuri, Jan-Philipp Fränken, Tobias Gerstenberg, and Noah D Goodman. Star-gate: Teaching language models to ask clarifying questions. *arXiv preprint arXiv:2403.19154*, 2024.
- [3] Sercan Ö. Arik, Maximillian Chen, Ruoxi Sun, and Tomas Pfister. Learning to clarify: Multi-turn conversations with action-based contrastive self-training. In *arXiv.org*, 2024. URL <https://api.semanticscholar.org/CorpusId:270220485>.
- [4] Ashutosh Baheti, Ximing Lu, Faeze Brahman, Ronan Le Bras, Maarten Sap, and Mark Riedl. Leftover lunch: Advantage-based offline reinforcement learning for language models. In *Proceedings of the 12th International Conference on Learning Representations*, 2024.
- [5] Jonathan Baxter and Peter Bartlett. Infinite-horizon policy-gradient estimation. *Journal of Artificial Intelligence Research*, 15:319–350, 2001.
- [6] Rishi Bommasani et al. On the opportunities and risks of foundation models. *CoRR*, abs/2108.07258, 2021. URL <https://arxiv.org/abs/2108.07258>.
- [7] Tom Brown, Benjamin Mann, Nick Ryder, Melanie Subbiah, Jared D Kaplan, Prafulla Dhariwal, Arvind Neelakantan, Pranav Shyam, Girish Sastry, Amanda Askell, et al. Language models are few-shot learners. *Advances in neural information processing systems*, 33:1877–1901, 2020.
- [8] Tom Brown et al. Language models are few-shot learners. In *Advances in Neural Information Processing Systems 33*, 2020.
- [9] Yash Butala, Siddhant Garg, Pratyay Banerjee, and Amita Misra. Promise: A proactive multi-turn dialogue dataset for information-seeking intent resolution. In *Findings of the Association for Computational Linguistics: EACL 2024*, pages 1774–1789, 2024.
- [10] Fu-Chieh Chang, Yu-Ting Lee, Hui-Ying Shih, and Pei-Yuan Wu. RL-star: Theoretical analysis of reinforcement learning frameworks for self-taught reasoner. *arXiv preprint arXiv:2410.23912*, 2024.
- [11] Danqi Chen, Adam Fisch, Jason Weston, and Antoine Bordes. Reading wikipedia to answer open-domain questions. In *Proceedings of the 55th Annual Meeting of the Association for Computational Linguistics (Volume 1: Long Papers)*, pages 1870–1879, 2017.
- [12] Maximillian Chen, Ruoxi Sun, and Sercan Ö Arik. Data-centric improvements for enhancing multi-modal understanding in spoken conversation modeling. *arXiv preprint arXiv:2412.15995*, 2024.
- [13] Maximillian Chen, Ruoxi Sun, Sercan Ö Arik, and Tomas Pfister. Learning to clarify: Multi-turn conversations with action-based contrastive self-training. *arXiv preprint arXiv:2406.00222*, 2024.
- [14] Yizhou Chi, Jessy Lin, Kevin Lin, and Dan Klein. Clarinet: Augmenting language models to ask clarification questions for retrieval. In *unknown*, 2024. URL <https://api.semanticscholar.org/CorpusId:270063669>.
- [15] Tianzhe Chu, Yuexiang Zhai, Jihan Yang, Shengbang Tong, Saining Xie, Dale Schuurmans, Quoc V Le, Sergey Levine, and Yi Ma. SFT memorizes, RL generalizes: A comparative study of foundation model post-training. *arXiv preprint arXiv:2501.17161*, 2025.
- [16] Peter Clark, Isaac Cowhey, Oren Etzioni, Tushar Khot, Ashish Sabharwal, Carissa Schoenick, and Oyvind Tafjord. Think you have solved question answering? try arc, the ai2 reasoning challenge. *arXiv preprint arXiv:1803.05457*, 2018.
- [17] Yang Deng, Lizi Liao, Wenqiang Lei, Grace Yang, Wai Lam, and Tat-Seng Chua. Proactive conversational ai: A comprehensive survey of advancements and opportunities. *ACM Transactions on Information Systems*, 2025.
- [18] Miroslav Dudík, Dumitru Erhan, John Langford, and Lihong Li. Doubly robust policy evaluation and optimization. *Statistical Science*, 29(4):485–511, 2014.
- [19] Kevin Fischer, Darren Fürst, Sebastian Steindl, Jakob Lindner, and Ulrich Schäfer. Question: How do large language models perform on the question answering tasks? answer. *arXiv preprint arXiv:2412.12893*, 2024.

- [20] Michael Free, Andrew Langworthy, Mary Dimitropoulaki, and Simon Thompson. Towards goal-oriented agents for evolving problems observed via conversation. In *unknown*, 2024. URL <https://api.semanticscholar.org/CorpusId:265213767>.
- [21] Chongming Gao, Mengyao Gao, Chenxiao Fan, Shuai Yuan, Wentao Shi, and Xiangnan He. Process-supervised llm recommenders via flow-guided tuning. *arXiv preprint arXiv:2503.07377*, 2025.
- [22] Xiaofeng Gao, Qiaozi Gao, Ran Gong, Kaixiang Lin, G. Thattai, and G. Sukhatme. Dialfred: Dialogue-enabled agents for embodied instruction following. In *IEEE Robotics and Automation Letters*, 2022. URL <https://api.semanticscholar.org/CorpusId:247158852>.
- [23] Meera Hahn, Wenjun Zeng, Nithish Kannen, Rich Galt, Kartikeya Badola, Been Kim, and Zi Wang. Proactive agents for multi-turn text-to-image generation under uncertainty. *arXiv preprint arXiv:2412.06771*, 2024.
- [24] Dan Hendrycks, Collin Burns, Steven Basart, Andy Zou, Mantas Mazeika, Dawn Song, and Jacob Steinhardt. Measuring massive multitask language understanding. In *International Conference on Learning Representations*.
- [25] Joey Hong, S. Levine, and Anca Dragan. Zero-shot goal-directed dialogue via rl on imagined conversations. *ArXiv*, abs/2311.05584, 2023. URL <https://api.semanticscholar.org/CorpusId:265067195>.
- [26] Joey Hong, Anca Dragan, and Sergey Levine. Q-SFT: Q-learning for language models via supervised fine-tuning. In *Proceedings of the 13th International Conference on Learning Representations*, 2025.
- [27] D. G. Horvitz and D. J. Thompson. A generalization of sampling without replacement from a finite universe. *Journal of the American Statistical Association*, 47(260):663–685, 1952.
- [28] Arian Hosseini, Xingdi Yuan, Nikolay Malkin, Aaron Courville, Alessandro Sordoni, and Rishabh Agarwal. V-star: Training verifiers for self-taught reasoners. *arXiv preprint arXiv:2402.06457*, 2024.
- [29] Edward Ionides. Truncated importance sampling. *Journal of Computational and Graphical Statistics*, 17(2):295–311, 2008.
- [30] Diederik Kingma and Jimmy Ba. Adam: A method for stochastic optimization. In *Proceedings of the 3rd International Conference on Learning Representations*, 2015.
- [31] Katarzyna Kobalcyk, Nicolas Astorga, Tension Liu, and Mihaela van der Schaar. Active task disambiguation with llms. *arXiv preprint arXiv:2502.04485*, 2025.
- [32] Tom Kwiatkowski, Jennimaria Palomaki, Olivia Redfield, Michael Collins, Ankur Parikh, Chris Alberti, Danielle Epstein, Illia Polosukhin, Jacob Devlin, Kenton Lee, et al. Natural questions: a benchmark for question answering research. *Transactions of the Association for Computational Linguistics*, 7:453–466, 2019.
- [33] Sascha Lange, Thomas Gabel, and Martin Riedmiller. *Batch Reinforcement Learning*, pages 45–73. Springer Berlin Heidelberg, Berlin, Heidelberg, 2012.
- [34] Hyunji Lee, Franck Dernoncourt, Trung Bui, and Seunghyun Yoon. Corg: Generating answers from complex, interrelated contexts. In *Proceedings of the 2025 Conference of the Nations of the Americas Chapter of the Association for Computational Linguistics: Human Language Technologies (Volume 1: Long Papers)*, pages 8443–8460, 2025.
- [35] Sergey Levine, Aviral Kumar, George Tucker, and Justin Fu. Offline reinforcement learning: Tutorial, review, and perspectives on open problems. *CoRR*, abs/2005.01643, 2020. URL <https://arxiv.org/abs/2005.01643>.
- [36] Zixuan Li, Lizi Liao, and Tat-Seng Chua. Learning to ask critical questions for assisting product search. In *unknown*, 2024. URL <https://api.semanticscholar.org/CorpusId:268249077>.
- [37] Dawen Liang and Nikos Vlassis. Local policy improvement for recommender systems. *arXiv preprint arXiv:2212.11431*, 2022.
- [38] Baihan Lin. Reinforcement learning and bandits for speech and language processing: Tutorial, review and outlook. In *Expert systems with applications*, 2022. URL <https://api.semanticscholar.org/CorpusId:253107350>.

- [39] Alisa Liu, Zhaofeng Wu, Julian Michael, Alane Suhr, Peter West, Alexander Koller, Swabha Swayamdipta, Noah A Smith, and Yejin Choi. We’re afraid language models aren’t modeling ambiguity. *arXiv preprint arXiv:2304.14399*, 2023.
- [40] Lili Lu, Chuan Meng, Federico Ravenda, Mohammad Aliannejadi, and Fabio Crestani. Zero-shot and efficient clarification need prediction in conversational search. *arXiv preprint arXiv:2503.00179*, 2025.
- [41] Jakub Macina, Nico Daheim, Sankalan Pal Chowdhury, Tanmay Sinha, Manu Kapur, Iryna Gurevych, and Mrinmaya Sachan. Mathdial: A dialogue tutoring dataset with rich pedagogical properties grounded in math reasoning problems. *arXiv preprint arXiv:2305.14536*, 2023.
- [42] Leland McInnes, John Healy, and James Melville. Umap: Uniform manifold approximation and projection for dimension reduction. *arXiv preprint arXiv:1802.03426*, 2018.
- [43] Todor Mihaylov, Peter Clark, Tushar Khot, and Ashish Sabharwal. Can a suit of armor conduct electricity? a new dataset for open book question answering. In *EMNLP*, 2018.
- [44] Sewon Min, Julian Michael, Hannaneh Hajishirzi, and Luke Zettlemoyer. Ambigqa: Answering ambiguous open-domain questions. In *Proceedings of the 2020 Conference on Empirical Methods in Natural Language Processing (EMNLP)*, pages 5783–5797, 2020.
- [45] Volodymyr Mnih, Koray Kavukcuoglu, David Silver, Andrei A Rusu, Joel Veness, Marc G Bellemare, Alex Graves, Martin Riedmiller, Andreas K Fidjeland, Georg Ostrovski, et al. Human-level control through deep reinforcement learning. *nature*, 518(7540):529–533, 2015.
- [46] Nikahat Mulla and P. Gharpure. Automatic question generation: a review of methodologies, datasets, evaluation metrics, and applications. In *unknown*, 2023. URL <https://api.semanticscholar.org/CorpusId:256438998>.
- [47] Remi Munos. Geometric variance reduction in Markov chains: Application to value function and gradient estimation. *Journal of Machine Learning Research*, 7:413–427, 2006.
- [48] Long Ouyang, Jeffrey Wu, Xu Jiang, Diogo Almeida, Carroll Wainwright, Pamela Mishkin, Chong Zhang, Sandhini Agarwal, Katarina Slama, Alex Ray, John Schulman, Jacob Hilton, Fraser Kelton, Luke Miller, Maddie Simens, Amanda Askell, Peter Welinder, Paul Christiano, Jan Leike, and Ryan Lowe. Training language models to follow instructions with human feedback. In *Advances in Neural Information Processing Systems 35*, 2022.
- [49] Alec Radford, Jeffrey Wu, Rewon Child, David Luan, Dario Amodei, and Ilya Sutskever. Language models are unsupervised multitask learners. 2019.
- [50] Rafael Rafailov, Archit Sharma, Eric Mitchell, Christopher Manning, Stefano Ermon, and Chelsea Finn. Direct preference optimization: Your language model is secretly a reward model. In *Advances in Neural Information Processing Systems 36*, 2023.
- [51] Pranav Rajpurkar, Jian Zhang, Konstantin Lopyrev, and Percy Liang. Squad: 100,000+ questions for machine comprehension of text. In *Proceedings of the 2016 Conference on Empirical Methods in Natural Language Processing*, pages 2383–2392, 2016.
- [52] Adam Roberts, Colin Raffel, and Noam Shazeer. How much knowledge can you pack into the parameters of a language model? In *Proceedings of the 2020 Conference on Empirical Methods in Natural Language Processing (EMNLP)*, pages 5418–5426, 2020.
- [53] Sunny Sanyal, Hayden Prairie, Rudrajit Das, Ali Kavis, and Sujay Sanghavi. Upweighting easy samples in fine-tuning mitigates forgetting. *arXiv preprint arXiv:2502.02797*, 2025.
- [54] Alexander Scarlatos, Ryan S Baker, and Andrew Lan. Exploring knowledge tracing in tutor-student dialogues using llms. In *Proceedings of the 15th International Learning Analytics and Knowledge Conference*, pages 249–259, 2025.
- [55] Alexander Scarlatos, Naiming Liu, Jaewook Lee, Richard Baraniuk, and Andrew Lan. Training llm-based tutors to improve student learning outcomes in dialogues. *arXiv preprint arXiv:2503.06424*, 2025.
- [56] John Schulman, Filip Wolski, Prafulla Dhariwal, Alec Radford, and Oleg Klimov. Proximal policy optimization algorithms. *CoRR*, abs/1707.06347, 2017. URL <https://arxiv.org/abs/1707.06347>.

- [57] Zhihong Shao, Peiyi Wang, Qihao Zhu, Runxin Xu, Junxiao Song, Xiao Bi, Haowei Zhang, Mingchuan Zhang, Y. K. Li, Y. Wu, and Daya Guo. DeepSeekMath: Pushing the limits of mathematical reasoning in open language models. *CoRR*, abs/2402.03300, 2024. URL <https://arxiv.org/abs/2402.03300>.
- [58] Olivier Sigaud, Pierre-Yves Oudeyer, Thomas Carta, and Sylvain Lamprier. Eager: Asking and answering questions for automatic reward shaping in language-guided rl. In *Neural Information Processing Systems*, 2022. URL <https://api.semanticscholar.org/CorpusId:249890287>.
- [59] Charlie Victor Snell, Ilya Kostrikov, Yi Su, Sherry Yang, and Sergey Levine. Offline RL for natural language generation with implicit language Q learning. In *Proceedings of the 11th International Conference on Learning Representations*, 2023.
- [60] Richard Sutton and Andrew Barto. *Reinforcement Learning: An Introduction*. MIT Press, Cambridge, MA, 1998.
- [61] Richard Sutton, David McAllester, Satinder Singh, and Yishay Mansour. Policy gradient methods for reinforcement learning with function approximation. In *Advances in Neural Information Processing Systems 12*, pages 1057–1063, 2000.
- [62] Dirk Văth, Ngoc Thang Vu, and Lindsey Vanderlyn. Towards a zero-data, controllable, adaptive dialog system. In *International Conference on Language Resources and Evaluation*, 2024. URL <https://api.semanticscholar.org/CorpusId:268691395>.
- [63] Danae Sánchez Villegas, Ingo Ziegler, and Desmond Elliott. Imagechain: Advancing sequential image-to-text reasoning in multimodal large language models. *arXiv preprint arXiv:2502.19409*, 2025.
- [64] Leandro von Werra, Younes Belkada, Lewis Tunstall, Edward Beeching, Tristan Thrush, Nathan Lambert, Shengyi Huang, Kashif Rasul, and Quentin Gallouedec. TRL: Transformer Reinforcement Learning. <https://github.com/huggingface/trl>, 2020.
- [65] Haofen Wang, Yuanzi Li, Huifang Du, Xuejing Feng, Minghao Wu, and Shuqin Li. Rewarding what matters: Step-by-step reinforcement learning for task-oriented dialogue. In *Conference on Empirical Methods in Natural Language Processing*, 2024. URL <https://api.semanticscholar.org/CorpusId:270619424>.
- [66] Zhenduo Wang and Qingyao Ai. Simulating and modeling the risk of conversational search. In *ACM Trans. Inf. Syst.*, 2022. URL <https://api.semanticscholar.org/CorpusId:245650574>.
- [67] Christopher JCH Watkins and Peter Dayan. Q-learning. *Machine learning*, 8:279–292, 1992.
- [68] Johannes Welbl, Nelson F Liu, and Matt Gardner. Crowdsourcing multiple choice science questions. *W-NUT 2017*, page 94, 2017.
- [69] Ronald Williams. Simple statistical gradient-following algorithms for connectionist reinforcement learning. *Machine Learning*, 8(3-4):229–256, 1992.
- [70] Tao Yu, Rui Zhang, He Yang Er, Suyi Li, Eric Xue, Bo Pang, Xi Victoria Lin, Yi Chern Tan, Tianze Shi, Zihan Li, et al. Cosql: A conversational text-to-sql challenge towards cross-domain natural language interfaces to databases. *arXiv preprint arXiv:1909.05378*, 2019.
- [71] Eric Zelikman, Georges Raif Harik, Yijia Shao, Varuna Jayasiri, Nick Haber, and Noah Goodman. Quiet-star: Language models can teach themselves to think before speaking. In *First Conference on Language Modeling*, 2024.
- [72] Eric Zelikman, YH Wu, Jesse Mu, and Noah D Goodman. Star: Self-taught reasoner bootstrapping reasoning with reasoning. In *Proc. the 36th International Conference on Neural Information Processing Systems*, volume 1126, 2024.
- [73] Dylan Zhang, Qirun Dai, and Hao Peng. The best instruction-tuning data are those that fit. *arXiv preprint arXiv:2502.04194*, 2025.
- [74] Xinghua Zhang, Haiyang Yu, Yongbin Li, Minzheng Wang, Longze Chen, and Fei Huang. The imperative of conversation analysis in the era of llms: A survey of tasks, techniques, and trends. In *unknown*, 2024. URL <https://api.semanticscholar.org/CorpusId:272828048>.



- 529 [75] Xuan Zhang, Yang Deng, Zifeng Ren, See-Kiong Ng, and Tat-Seng Chua. Ask-before-plan:  
530 Proactive language agents for real-world planning, 2024. URL [https://arxiv.org/abs/](https://arxiv.org/abs/2406.12639)  
531 [2406.12639](https://arxiv.org/abs/2406.12639).
- 532 [76] Xuan Zhang, Yongliang Shen, Zhe Zheng, Linjuan Wu, Wenqi Zhang, Yuchen Yan, Qiuying  
533 Peng, Jun Wang, and Weiming Lu. Asktoact: Enhancing llms tool use via self-correcting  
534 clarification. *arXiv preprint arXiv:2503.01940*, 2025.
- 535 [77] Xuandong Zhao, Will Cai, Tianneng Shi, David Huang, Licong Lin, Song Mei, and Dawn  
536 Song. Improving llm safety alignment with dual-objective optimization. *arXiv preprint*  
537 *arXiv:2503.03710*, 2025.
- 538 [78] Li Zhou, Kevin Small, Oleg Rokhlenko, and Charles Elkan. End-to-end offline goal-oriented  
539 dialog policy learning via policy gradient. In *NeurIPS 2017 Workshop on Conversational AI*,  
540 2017.

## NeurIPS Paper Checklist

### 1. Claims

Question: Do the main claims made in the abstract and introduction accurately reflect the paper’s contributions and scope?

Answer: [Yes]

Justification: Our offline RL algorithms are developed in Section 3 and we evaluate them on six benchmarks in Section 4.

### 2. Limitations

Question: Does the paper discuss the limitations of the work performed by the authors?

Answer: [Yes]

Justification: The limitations are the computational cost of RL and that we do not try to address the quality of the logged dataset. We discuss them in Section 6.

### 3. Theory assumptions and proofs

Question: For each theoretical result, does the paper provide the full set of assumptions and a complete (and correct) proof?

Answer: [Yes]

Justification: The setting is clearly defined in Section 2. All theoretical claims are stated as lemmas in Section 3 and proved.

### 4. Experimental result reproducibility

Question: Does the paper fully disclose all the information needed to reproduce the main experimental results of the paper to the extent that it affects the main claims and/or conclusions of the paper (regardless of whether the code and data are provided or not)?

Answer: [Yes]

Justification: We give a high-level overview of the experimental setup in Section 4 and provide details in Appendix.

### 5. Open access to data and code

Question: Does the paper provide open access to the data and code, with sufficient instructions to faithfully reproduce the main experimental results, as described in supplemental material?

Answer: [Yes]

Justification: We provide anonymous access. See Appendix.

### 6. Experimental setting/details

Question: Does the paper specify all the training and test details (e.g., data splits, hyperparameters, how they were chosen, type of optimizer, etc.) necessary to understand the results?

Answer: [Yes]

Justification: We give a high-level overview of the experimental setup in Section 4 and provide details in Appendix.

### 7. Experiment statistical significance

Question: Does the paper report error bars suitably and correctly defined or other appropriate information about the statistical significance of the experiments?

Answer: [Yes]

Justification: All metrics are reported with standard errors estimated from 500 runs.

### 8. Experiments compute resources

Question: For each experiment, does the paper provide sufficient information on the computer resources (type of compute workers, memory, time of execution) needed to reproduce the experiments?

Answer: [Yes]

Justification: We report compute resources in Appendix.

#### 9. Code of ethics

Question: Does the research conducted in the paper conform, in every respect, with the NeurIPS Code of Ethics <https://neurips.cc/public/EthicsGuidelines?>

Answer: [Yes]

Justification: This work did not involve human labor and we used only public datasets.

#### 10. Broader impacts

Question: Does the paper discuss both potential positive societal impacts and negative societal impacts of the work performed?

Answer: [NA]

Justification: The topic of this paper is a simple and practical offline RL algorithm. There is no specific societal impact of our work beyond improvements in RL in general.

#### 11. Safeguards

Question: Does the paper describe safeguards that have been put in place for responsible release of data or models that have a high risk for misuse (e.g., pretrained language models, image generators, or scraped datasets)?

Answer: [NA]

Justification: No new data or models are released in this paper.

#### 12. Licenses for existing assets

Question: Are the creators or original owners of assets (e.g., code, data, models), used in the paper, properly credited and are the license and terms of use explicitly mentioned and properly respected?

Answer: [Yes]

Justification: We properly cite all datasets and use them within the bounds of their licenses.

#### 13. New assets

Question: Are new assets introduced in the paper well documented and is the documentation provided alongside the assets?

Answer: [NA]

Justification: No new data or models are released in this paper.

#### 14. Crowdsourcing and research with human subjects

Question: For crowdsourcing experiments and research with human subjects, does the paper include the full text of instructions given to participants and screenshots, if applicable, as well as details about compensation (if any)?

Answer: [NA]

Justification: This paper does not involve crowdsourcing experiments or human subjects.

#### 15. Institutional review board (IRB) approvals or equivalent for research with human subjects

Question: Does the paper describe potential risks incurred by study participants, whether such risks were disclosed to the subjects, and whether Institutional Review Board (IRB) approvals (or an equivalent approval/review based on the requirements of your country or institution) were obtained?

Answer: [NA]

Justification: This paper does not involve crowdsourcing experiments or human subjects.

#### 16. Declaration of LLM usage

Question: Does the paper describe the usage of LLMs if it is an important, original, or non-standard component of the core methods in this research? Note that if the LLM is used only for writing, editing, or formatting purposes and does not impact the core methodology, scientific rigor, or originality of the research, declaration is not required.

Answer: [Yes]

Justification: Our work is motivated by RL with LLMs and we also experiment with them.

## A Proofs and Supporting Lemmas

This section contains proofs of our main claims and supporting lemmas.

### A.1 Proof of Lemma 2

We first note that

$$\mathbb{E}_{x \sim q, \tau_n \sim \pi(\cdot | x; \theta)} [\tilde{r}(x, \tau_n)] = \mathbb{E}_{x \sim q} \left[ \frac{1}{\sigma(x)} \mathbb{E}_{\tau_n \sim \pi(\cdot | x; \theta)} [r(x, \tau_n) | x] \right] - C,$$

where  $C = \mathbb{E}_{x \sim q} [\mu(x)/\sigma(x)]$  is a constant independent of  $\theta$ . Since all  $\mathbb{E}_{\tau_n \sim \pi(\cdot | x; \theta)} [r(x, \tau_n) | x]$  are jointly maximized by  $\theta_*$  and the weights  $1/\sigma(x)$  are non-negative,  $\theta_*$  also maximizes any weighted combination of the objectives. This concludes our proof.

### A.2 Proof of Lemma 3

Using basic algebra,

$$\begin{aligned} \mathbb{E}_{x \sim q, \tau_n \sim \pi(\cdot | x; \theta)} [\tilde{r}(x, \tau_n)] &= \mathbb{E}_{x \sim q, \tau_n \sim \pi_0(\cdot | x)} \left[ \tilde{r}(x, \tau_n) \frac{\pi(\tau_n | x; \theta)}{\pi_0(\tau_n | x)} \right] \\ &= \mathbb{E}_{x \sim q, \tau_n \sim \pi_0(\cdot | x)} \left[ \tilde{r}(x, \tau_n) \left( 1 + \log \frac{\pi(\tau_n | x; \theta)}{\pi_0(\tau_n | x)} \right) \right] + \Delta(\theta) \\ &= \mathbb{E}_{x \sim q, \tau_n \sim \pi_0(\cdot | x)} [\tilde{r}(x, \tau_n) \log \pi(\tau_n | x; \theta)] + \Delta(\theta) + C_1, \end{aligned}$$

where

$$\Delta(\theta) = \mathbb{E}_{x \sim q, \tau_n \sim \pi_0(\cdot | x)} \left[ \tilde{r}(x, \tau_n) \left( \frac{\pi(\tau_n | x; \theta)}{\pi_0(\tau_n | x)} - \left( 1 + \log \frac{\pi(\tau_n | x; \theta)}{\pi_0(\tau_n | x)} \right) \right) \right]$$

and  $C_1$  is a constant independent of  $\theta$  defined in Lemma 1. Now we rearrange the equality, take the absolute value of both sides, and get

$$\begin{aligned} \left| \mathbb{E}_{x \sim q, \tau_n \sim \pi(\cdot | x; \theta)} [\tilde{r}(x, \tau_n)] - \mathbb{E}_{x \sim q, \tau_n \sim \pi_0(\cdot | x)} [\tilde{r}(x, \tau_n) \log \pi(\tau_n | x; \theta)] \right| &= |C_1 + \Delta(\theta)| \\ &\leq |C_1| + |\Delta(\theta)|. \end{aligned}$$

We bound  $|\Delta(\theta)|$  as

$$\begin{aligned} |\Delta(\theta)| &\leq \mathbb{E}_{x \sim q, \tau_n \sim \pi_0(\cdot | x)} \left[ \left| \tilde{r}(x, \tau_n) \left( \frac{\pi(\tau_n | x; \theta)}{\pi_0(\tau_n | x)} - \left( 1 + \log \frac{\pi(\tau_n | x; \theta)}{\pi_0(\tau_n | x)} \right) \right) \right| \right] \\ &\leq \max_{x, \tau_n} \left| \tilde{r}(x, \tau_n) \left( \frac{\pi(\tau_n | x; \theta)}{\pi_0(\tau_n | x)} - \left( 1 + \log \frac{\pi(\tau_n | x; \theta)}{\pi_0(\tau_n | x)} \right) \right) \right| \\ &\leq b \max_{x, \tau_n} \left( \frac{\pi(\tau_n | x; \theta)}{\pi_0(\tau_n | x)} - \left( 1 + \log \frac{\pi(\tau_n | x; \theta)}{\pi_0(\tau_n | x)} \right) \right). \end{aligned}$$

The last step holds because the rewards are in  $[-b, b]$  and  $u \geq 1 + \log u$ . Finally, to bound  $|\Delta(\theta)|$ , we maximize over  $\theta$ . This concludes the proof.

## B Detailed Related Work

Related work can be categorized into techniques for clarifying questions for multi-turn multimodal generation (e.g., MLLMs) or text-to-text generation (e.g., LLMs) settings. We also discuss related work on simulating user conversation trajectories and reinforcement learning approaches proposed for other problem settings.

### B.1 Supervised Learning

Many works have recently focused on clarifying user prompts by asking clarifying questions [39, 72]. Liu et al. [39] collect a dataset of 1,645 linguistic examples and different ambiguity labels. This is

due to there being many different types of ambiguity. Zelikman et al. [72] introduced a simple and influential method: learn from rationales by fine-tuning on successful examples and regenerating rationales for failures. Given a prompt, generate a rationale and answer. If the answer is correct, fine-tune on prompt, rationale, and answer. Otherwise use the correct answer to generate a new rationale that leads to the correct answer. Fine-tune on prompt, rationale, and answer. This idea has since been extended in several directions. V-STaR [28] extends the idea to vision-language tasks, and Quiet-STaR [71] focuses on learning when not to ask, optimizing a policy to minimize unnecessary queries. We discuss extensions to reinforcement learning in Appendix B.4. A recent survey by Deng et al. [17] on proactive conversational techniques, which includes those focused on asking clarifying questions for disambiguation and the ilk.

Active disambiguation using LLMs has also been recently investigated [31, 76, 9]. AskToAct [76] focused on improving tool use via a self-correction mechanism for clarification. They generate a dataset and then fine-tune on it. Kobalczyk et al. [31] select clarifying questions based on information gain. Their approach emphasizes inference-time reasoning with pre-trained LLMs, while we learn task-specific policies that optimize questioning directly and efficiently without inference-time computation over all possible responses.

Recent works have also focused on benchmarking multi-turn conversational dialogue between users and agent for the purpose of clarification [9]. Zhang et al. [75] introduced a benchmark dataset and proposed an approach called Clarification-Execution-Planning (CEP) that uses specialized agents for clarification, execution, and planning. They predict if the question should be clarified and then generate a clarification.

Many works have also focused on the problem of predicting whether clarification is required in conversational interfaces [40, 9]. One recent work by [40] investigated a zero-shot approach for clarification detection in conversational search. They learn a classifier with an LLM backbone to predict if the query is specific or ambiguous. The training data are generated using a zero-shot LLM. Li et al. [36] focuses on learning to ask critical questions in product search, using a dual-learning model that combines implicit session feedback with proactive clarification.

Surveys have further synthesized this area. Mulla and Gharpure [46] reviews progress in automatic question generation, including early reinforcement learning attempts, noting RL’s ability to improve the flow of conversation by considering losses accumulated over  $n$  turns in a dialog sequence. Furthermore, Zhang et al. [74] surveys how conversation analysis can help in the era of LLMs. They discussed conversation optimization using RL to improve conversation policy learning. The paper also touches on adapting LLMs with RL for goal-directed conversations, though not specifically focused on question asking.

## B.2 Supervised Learning with Multi-Modal Models

Multimodal multi-turn conversations that perform text-to-image generation have also been studied for asking clarifying questions to disambiguate and improve generation [23]. In particular, Hahn et al. [23] introduced an uncertainty-driven method that adaptively triggers clarifying questions when the system’s confidence is low, enhancing multi-turn generation performance. This work also developed an automatic evaluation framework simulating users to assess question-asking strategies, using a suite of simple agents, including rule-based, belief-based, and LLM-based approaches, however, none of them incorporated any learning-based optimization.

Conversely, Villegas et al. [63] proposed ImageChain that focuses on image-to-text reasoning in MLLMs by considering a sequence of images as a multi-turn conversation along with the generated textual descriptions to create a succinct narrative, which has applications in video generation. Sequential reasoning over images and text. The description of the next image (treated as an agent) is conditioned on that image (treated as a user) and the history of the conversation.

Other work by Chen et al. [12] focused on improving multi-modal understanding for spoken conversations. They use spoken language to improve multi-modal conversations. That work constructed a dataset of per-turn preferences, annotating winning and losing responses, and applied Direct Preference Optimization (DPO) at each step. In contrast, our work improves upon this in three key ways: (1) we employ a more principled objective-driven simulation strategy; (2) we eliminate the need for DPO entirely since rewards are explicitly defined, direct reward-based policy gradients are both simpler and more efficient; and (3) we provide formal justification for our method.



### 716 B.3 Classic RL

717 For an overview of pre-2020 RL works on dialogue optimization, please see Section 6.6 of Levine  
718 et al. [35]. The closest related work is Zhou et al. [78], which proposed both online and offline policy  
719 gradients. They have per-step rewards and a fixed dataset of trajectories. They focus on improving  
720 language quality only, without any LLMs or simulators.

721 A large subset of prior work focuses on learning when and what to ask using RL. For example,  
722 DialFRED [22] trains an RL-based questioner agent to decide what questions to ask to complete  
723 household tasks, penalizing invalid questions. Sigaud et al. [58] used reinforcement learning to train  
724 an agent to ask questions. It uses question generation and question answering systems to create  
725 auxiliary objectives for reward shaping, improving sample efficiency in language-conditioned RL.

726 Further, Free et al. [20] leveraged Q-learning with DQN and BERT embeddings to train a chatbot  
727 that gathers hidden grid-world information by asking strategic questions to a simulated user. In the  
728 space of conversational recommendation, Lin [38] framed question selection as a bandit optimization  
729 problem, aiming to minimize unnecessary queries while also exploring RL fine-tuning of LLMs for  
730 human-like dialogue. Similarly, Wang and Ai [66] used reinforcement learning to train a DQN model  
731 for risk control in conversational search, focusing on when to ask clarifying questions. The RL agent  
732 learns to balance the rewards of asking relevant questions against the penalties of irrelevant ones.

733 Finally, V  th et al. [62] introduced a benchmark (LMRL-Gym) for evaluating multi-turn RL for  
734 LLMs, with the goal of enabling intentional interactions through carefully crafted questions, which is  
735 optimized by Q learning and DQN specifically.

### 736 B.4 RL with LLMs

737 On RL with LLMs, Hong et al. [25] used offline RL to optimize goal-directed dialogues, leveraging  
738 LLMs to simulate human-like interactions and generate data for training. It addresses the limitations  
739 of LLMs in asking effective questions and optimizing for conversational outcomes over multiple  
740 turns. The method trains offline RL on the generated dataset. The RL algorithm is classic: implicit  
741 language q learning. We want to avoid value and Q functions.

742 One closely related work is learning to ask clarifying questions by STaR-GATE [2]. Their algorithm  
743 incorporates interactive conversations and preference elicitation from simulators, fine-tuning on best  
744 responses. This work leverages simulated trajectories between an optimized agent and a user to  
745 collect training data. Then it falls back to supervised learning: SFT on most rewarding trajectories  
746 is used to fine-tune the original LLM. This approach fails to make the full use of the reward signal,  
747 because SFT is equivalent to treating all best demonstrations as equally optimal. This leads to reduced  
748 statistical efficiency and a limited ability to capture nuanced training signals, which our approach  
749 addresses by preserving and exploiting the full reward structure.

750 Further, RL-STaR [10] provides a theoretical analysis for STaR-style updates in a reinforcement  
751 learning framework. Another related work is learning to tutor [55], which leverages simulated  
752 trajectories between an optimized agent and a user to collect training data. Then it applied DPO to  
753 learn from pairs of winning and losing trajectories. This approach fails to make the full use of the  
754 reward signal, since DPO reduces reward information to binary pairwise preferences, discarding  
755 finer-grained distinctions. This leads to reduced statistical efficiency and a limited ability to capture  
756 nuanced training signals, which our approach addresses by preserving and exploiting the full reward  
757 structure.

758 One work by Chen et al. [13] studied disambiguation in LLM-based conversations and develops an  
759 approach based on DPO for task-specific use cases that lack high-quality conversational trajectories  
760 such as data question-answering and SQL generation. Unlike the other works discussed above  
761 that focus on clarifying question generation for disambiguation in MLLMs, this work develops an  
762 approach for the simpler LLM clarification question generation problem that takes only text as input  
763 and generates only text as output (whether it is code, data, or other types of text). This is definitely  
764 RL. Similar to [55] but applied to multi-modal models. Additionally, Chi et al. [14] learned to ask  
765 clarifying questions in information retrieval. The key idea is to simulate potential clarifying questions  
766 and user responses, and then fine-tune on those that lead to the highest improvement in ranking  
767 metrics. This is not RL but the idea is similar to our SFT RL baseline.

Furthermore, Chu et al. [15] investigated SFT and RL on generalization and memorization and find that on a few text and visual tasks that RL generalizes better in both rule-based textual and visual environments whereas SFT mostly memorizes the training data and fails to generalize in the out-of-distribution setting. This one is methodological. Interestingly, we show a connection because RL can be viewed as weighted SFT. Another work by Arik et al. [3] improved conversational skills, specifically clarification question asking, using Action-Based Contrastive Self-Training (ACT). ACT is a DPO-based algorithm for sample-efficient dialogue policy learning. While RLHF is mentioned as a paradigm for building conversational agents, the paper’s primary contribution is not directly about using RL for question asking, but DPO. Wang et al. [65] used reinforcement learning to enhance task-oriented dialogue systems, focusing on improving both understanding and generation tasks. It introduces step-by-step rewards throughout token generation to optimize dialogue state tracking and response generation. The approach is a variant of PPO and the focus is on individual token generation.

## B.5 Offline RL Algorithms for LLM Post-Training

It is well known in literature that when viewing an LLM based generation as a sequential decision process, the state comprises of the entire history of generated tokens, the action next generated token, and the transition function is a deterministic concatenation of the action token to the state tokens. So, when viewed from the perspective of an environment for RL, the only missing component is the reward function which is external to the LLM and needs to be provided. So, the key difference between online and offline RL in the case of LLMs is the availability of a reward function. In one of the earliest papers on RLHF [48], the authors converted offline feedback data collected from users to learn a reward function and then use an online RL algorithm (PPO) to train the LLM. Another branch of work attempted to explore use of offline RL methods to train LLMs with user feedback. One such method was ILQL [59], where the key idea was to learn a Q function with the LLM’s hidden state forming the features for this Q function. In this case too some form of numerical reward from the user was needed, but this could be completely offline. The key considerations here were standard offline RL cautionary points such as ensuring to stay within the training data distribution for the Bellman updates (conservative QL) and the added complexity of estimating and using Q values during inference. Algorithms inspired by KL constrained policy optimization objectives such as DPO [50] also function in an offline manner with the objective being to effectively learn an implicit reward function that is consistent with preference data collected from users. However, collection of pairwise preference data is a key requirement of this approach. A more detailed discussion on various offline policy based RL algorithms for LLM post-training is provided in Baheti et al. [4].

We specifically consider the objective functions of two policy based offline RL algorithms - DPO and ALOL to illustrate the key differences between them and our approach:

$$\begin{aligned} \nabla J(\theta)_{DPO} &= \beta \mathbb{E}_{x \sim q, \tau_n \sim \pi_0(\cdot|x)} \left[ \sigma(\hat{r}(x, \tau_{nl}) - \hat{r}(x, \tau_{nw})) \left[ \sum_{t=1}^{nw} \nabla \log \pi(a_t | x, \tau_{t-1}; \theta) - \sum_{t=1}^{nl} \nabla \log \pi(a_t | x, \tau_{t-1}; \theta) \right] \right], \\ \nabla J(\theta)_{A-LOL} &= \mathbb{E}_{x \sim q, \tau_n \sim \pi_0(\cdot|x)} \left[ A_{\pi_0}(x, \tau_n) \hat{r}(x, \tau_n) \sum_{t=1}^n \nabla \log \pi(a_t | x, \tau_{t-1}; \theta) \right], \end{aligned}$$

where  $nw, nl$  represent the indices of the chosen and rejected sequences respectively,  $\hat{r}$  represents the policy ratio of the propensities with respect to the reference policy and  $A_{\pi_0}$  represents the advantage function under the reference policy. We notice that both these gradient estimates can be considered as scaled versions of the off-policy vanilla policy gradient, with the scaling factor in both these cases being a function of the ratio of the propensities under the policy being optimized and the reference policy. In our formulation, we avoid these scaling factors ensure stability and simplicity, while trading off for an objective that provides a loose lower bound for the original one.

## C Dataset

In this section, we present a comprehensive summary of the six benchmark datasets discussed, along with the experimental setup:

**OpenBookQA [43]** is a question-answering dataset modeled after open book exams, consisting of 5,957 multiple-choice elementary-level science questions (4,957 train, 500 dev, 500 test). It tests understanding of a small "book" of 1,326 core science facts and their application to novel situations. What makes this dataset challenging is that answering questions requires additional common knowledge beyond what's in the provided "book."

**SciQA [68]** is a multimodal dataset that evaluates AI models' ability to reason using both textual and visual information for science topics. It includes approximately 21,000 multimodal questions covering physics, chemistry, and biology, sourced from educational materials. Models must analyze both text and diagrams to generate correct answers.

**MMLU [24]** is a comprehensive benchmark that evaluates models on multiple choice questions across 57 subjects, including STEM, humanities, social sciences, and more, with difficulty levels ranging from elementary to advanced professional level. It focuses exclusively on zero-shot and few-shot settings, making it similar to how we evaluate humans. The benchmark tests both world knowledge and problem-solving ability.

**ARC [16]** is a dataset of 7,787 genuine grade-school level, multiple-choice science questions from grade 3 to 9. It's divided into two parts: the Challenge Set with 2,590 "hard" questions that both retrieval and co-occurrence methods fail to answer correctly, and an Easy Set with 5,197 questions. Most questions have 4 answer choices, with less than 1

**CoSQL [70]** is a corpus for building cross-domain conversational text-to-SQL systems. It consists of over 30,000 dialogue turns plus more than 10,000 annotated SQL queries, obtained from a Wizard-of-Oz collection of 3,000 dialogues querying 200 complex databases spanning 138 domains. Each dialogue simulates a real-world database query scenario with a crowd worker as a user exploring the database and a SQL expert retrieving answers with SQL. The average question length in CoSQL is 11.2 words with an average of 5.2 question turns per dialogue.

**MathDial [41]** is a dataset of one-to-one teacher-student tutoring dialogues grounded in multi-step math reasoning problems. The dataset contains 2,861 conversations in total, split into train and test sets. It was created by pairing human teachers with a Large Language Model (LLM) that was prompted to represent common student errors and uses LLMKT model [54]. The dataset focuses on effective tutoring rather than just problem-solving and exhibits rich pedagogical properties, focusing on guiding students using sense-making questions.

**Experimental Setup:** For our experiments, we randomly selected 500 samples from each dataset, allocating 400 for training and 100 for testing. We created conversations with 3 turns and generated 3 random runs (trajectories) with different temperature settings using our **Base** model.

## D Prompt Examples

We present different prompt examples spanning various domain in this section.

### D.1 ARC Prompt Example

We first present the conversation of the first two steps of the three-step multi-turn conversation below from the ARC dataset:

### User Message 1

Question: Which of the following best explains how stems transport water to other parts of the plant? Choices: A. through a chemical called chlorophyll B. by using photosynthesis C. through a system of tubes D. by converting water to food

This question is from a science exam. Please use <thinking></thinking> tags to show your step-by-step reasoning, then provide your initial thoughts outside of these tags.

851

### Assistant Message 1

The answer is C. <thinking> To determine the correct answer, I will evaluate each option in relation to how stems transport water to other parts of a plant. A. Chlorophyll is a chemical that is essential for photosynthesis, but it is not directly responsible for transporting water through the plant. Chlorophyll is involved in absorbing light energy, which is necessary for photosynthesis to occur, but it is not the mechanism by which water is transported. B. Photosynthesis is the process by

852

### User Message 2

That's a good start. Can you explain more about why some options might be incorrect? Use <thinking></thinking> tags for your analysis.

853

### Assistant Message 2

<thinking> Photosynthesis is the process by which plants convert light energy into chemical energy in the form of glucose. While photosynthesis occurs in the leaves, which are attached to the stems, it is not the process by which water is transported to other parts of the plant. The question specifically asks about the mechanism of water transport, not the process of energy conversion. C. The xylem is a type of vascular tissue that is found in the stems of plants, which is responsible for transporting water and

854

### User Message 3

Thank you for your detailed explanations. What is your final answer (A, B, C, or D)? Please provide a justification for your choice. You MUST first state your final answer in the format: 'The answer is X' where X is A, B, C, or D. The final answer must be outside the thinking tags. Then show your thinking in <thinking></thinking> tags for your step-by-step reasoning.

855

856 **Final Response by Base and Evaluation by GPT4o**

857 We can observe from the final response that the Base is very verbose.

### Assistant Message 3

</thinking> The xylem consists of dead cells that are hollow, which allows water to pass through them. This is why option A is incorrect. Chlorophyll is a chemical used in photosynthesis, not in transporting water. Photosynthesis is the process of plants converting light energy into chemical energy, but it's not related to water transport. Therefore, option B is also incorrect. Option D is incorrect because converting water to food is the process of photosynthesis

858

859

| Evaluation Scores by GPT4o |        |                                                                                                                           |
|----------------------------|--------|---------------------------------------------------------------------------------------------------------------------------|
| Criteria                   | Score  | Rating                                                                                                                    |
| Accuracy                   | 8/10   | <div><div></div><div></div><div></div><div></div><div></div><div></div><div></div><div></div><div></div><div></div></div> |
| Reasoning Ability          | 7/10   | <div><div></div><div></div><div></div><div></div><div></div><div></div><div></div><div></div><div></div><div></div></div> |
| Comprehensiveness          | 6/10   | <div><div></div><div></div><div></div><div></div><div></div><div></div><div></div><div></div><div></div><div></div></div> |
| Pedagogical Value          | 7/10   | <div><div></div><div></div><div></div><div></div><div></div><div></div><div></div><div></div><div></div><div></div></div> |
| Confidence Calibration     | 6/10   | <div><div></div><div></div><div></div><div></div><div></div><div></div><div></div><div></div><div></div><div></div></div> |
| Overall                    | 7.0/10 | <div><div></div><div></div><div></div><div></div><div></div><div></div><div></div><div></div><div></div><div></div></div> |

860

| Evaluation Justifications by GPT4o                                                                                                                                                                                                                                                                                         |  |
|----------------------------------------------------------------------------------------------------------------------------------------------------------------------------------------------------------------------------------------------------------------------------------------------------------------------------|--|
| <b>Accuracy: 8/10</b><br>The assistant is moving toward the correct answer, "C," and has correctly identified that the xylem is responsible for water transport. However, the explanation for option D is incomplete, and the assistant has not yet explicitly stated the final answer as requested.                       |  |
| <b>Reasoning Ability: 7/10</b><br>The reasoning is mostly logical and clear, particularly in explaining why options A and B are incorrect. However, the analysis of option D is cut off and incomplete, which detracts from the overall clarity and precision of the reasoning.                                            |  |
| <b>Comprehensiveness: 6/10</b><br>The assistant provides a good explanation for why options A and B are incorrect and begins to explain why C is correct. However, the discussion of option D is incomplete, and the explanation of the xylem could be expanded further to fully address the mechanism of water transport. |  |
| <b>Pedagogical Value: 7/10</b><br>The conversation is educational and provides some useful insights, particularly about chlorophyll and photosynthesis. However, the incomplete explanations for D and the xylem system limit the overall learning potential.                                                              |  |
| <b>Confidence Calibration: 6/10</b><br>The assistant appears confident in its reasoning but has not yet explicitly stated the final answer as requested. Additionally, the incomplete explanation of option D suggests a slight overconfidence in the clarity of its analysis.                                             |  |

861

| Overall Assessment by GPT4o                                                                                                                                                                                                                                                                                                                                  |                                                                                                                               |
|--------------------------------------------------------------------------------------------------------------------------------------------------------------------------------------------------------------------------------------------------------------------------------------------------------------------------------------------------------------|-------------------------------------------------------------------------------------------------------------------------------|
| <b>Final Score: 7.0/10</b>                                                                                                                                                                                                                                                                                                                                   |                                                                                                                               |
| <b>Summary:</b> The conversation is on the right track and provides a mostly accurate and logical explanation of the question. However, incomplete reasoning for option D and a lack of explicit final answer detract from the overall quality. Expanding on the xylem's role and fully addressing all options would improve the conversation significantly. |                                                                                                                               |
| Overall                                                                                                                                                                                                                                                                                                                                                      | <div><div></div><div></div><div></div><div></div><div></div><div></div><div></div><div></div><div></div><div></div></div> 7.0 |
| <div><div></div><div></div><div></div><div></div><div></div><div></div><div></div><div></div><div></div><div></div></div>                                                                                                                                                                                                                                    |                                                                                                                               |

862

Final Response by SWiFt and Evaluation by GPT4o



863 We now report the last turn of the conversation is shown here. We can observe from the final response  
864 of the **SWiFt** that it's response is drastically different from the response of the previous turn (and  
865 from **Base**). It has updated its reasoning process with additional observation/knowledge and therefore  
866 gets a higher evaluation from GPT4o.

### Assistant Message 3

choice C is the best explanation.  
</thinking>I have now fully explained why choice C is the best explanation for how stems transport water to other parts of the plant. Choice C states that stems transport water through a system of tubes, which is a more accurate description of the plant's water transport system. This system, known as xylem, is a network of tubes that allows water to move from the roots to the leaves of the plant. This is a fundamental process that supports the plant's

867

### Evaluation Scores by GPT4o

| Criteria               | Score          | Rating                                                                             |
|------------------------|----------------|------------------------------------------------------------------------------------|
| Accuracy               | 10/10          |  |
| Reasoning Ability      | 10/10          |  |
| Comprehensiveness      | 10/10          |  |
| Pedagogical Value      | 10/10          |  |
| Confidence Calibration | 10/10          |  |
| <b>Overall</b>         | <b>10.0/10</b> |  |

868

### Evaluation Justifications by GPT4o

#### Accuracy: 10/10

The assistant correctly identifies option C as the answer and provides a scientifically accurate explanation of how stems transport water through the xylem system. The explanation is factually correct and directly addresses the question.

#### Reasoning Ability: 10/10

The reasoning is excellent, with a clear and logical analysis of each option. The assistant methodically explains why each incorrect option is wrong and why the correct option is right, demonstrating strong critical thinking skills.

#### Comprehensiveness: 10/10

The response is exceptionally thorough, addressing all four options with detailed explanations. The assistant fully explains the role of the xylem in water transport and clearly articulates why the other options are incorrect.

#### Pedagogical Value: 10/10

The explanation is highly educational, providing clear distinctions between different plant processes (photosynthesis vs. water transport) and structures (chlorophyll vs. xylem). The response teaches valuable plant biology concepts in an accessible way.

#### Confidence Calibration: 10/10

The assistant demonstrates appropriate confidence in the answer, providing a direct statement followed by detailed supporting evidence. The thinking process is transparent and the conclusion is well-justified.

869

## Overall Assessment by GPT4o

**Final Score: 10.0/10**

**Summary:** This response is exemplary in every aspect. The assistant clearly identifies the correct answer and provides a comprehensive explanation of plant water transport systems. Each option is thoroughly analyzed with scientific accuracy, and the distinction between water transport mechanisms and other plant processes is clearly articulated. The thinking process is transparent and educational, making this an ideal model response for science education.

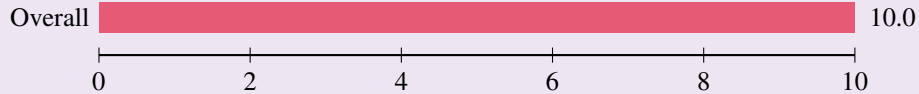

## D.2 CoSQL Prompt Example

We first present the conversation of the first two steps of the three-step multi-turn conversation below from the CoSQL dataset:

### User Message 1

Question: Your task is to generate SQL query based on the following question and information provided. Which distinctive models are produced by maker with the full name General Motors or weighing more than 3500? Hint: Consider relationships between multiple tables. The relevant schema tables are: ['car\_makers', 'model\_list', 'car\_names', 'cars\_data']. The optional foreign keys are: ['CAR\_NAMES.model = MODEL\_LIST.model', 'MODEL\_LIST.maker = CAR\_MAKERS.id', 'CARS\_DATA.id = CAR\_NAMES.makeid']. Choices: A. A. SELECT DISTINCT T1.Model, T3.FullName FROM CARS\_DATA AS T4 JOIN CAR\_NAMES AS T1 ON T4.Id = T1.MakeId LEFT JOIN CAR\_MAKERS AS T3 ON T1.MakeId = T3.Id WHERE T3.FullName LIKE '%General%' OR T4.weight < 3500; B. B. SELECT DISTINCT Model FROM MODEL\_LIST WHERE Maker IN (SELECT Id FROM CAR\_MAKERS WHERE FullName = 'General Motors' AND Id IN (SELECT MakeId FROM CARS\_DATA WHERE weight > 3500)); C. C. SELECT DISTINCT T2.Model FROM CAR\_NAMES AS T1 JOIN MODEL\_LIST AS T2 ON T1.Model = T2.Model JOIN CAR\_MAKERS AS T3 ON T2.Maker = T3.Id JOIN CARS\_DATA AS T4 ON T1.MakeId = T4.Id WHERE T3.FullName = 'General Motors' OR T4.weight > 3500; D. D. SELECT T1.Model FROM CAR\_NAMES AS T1 WHERE T1.Model IN (SELECT Model FROM CARS\_DATA WHERE weight > 3500) AND T1.MakeId IN (SELECT Id FROM CAR\_MAKERS WHERE FullName = 'General Motors');

This question asks for the correct SQL query to retrieve the requested information from a database. Focus on SQL syntax, correct table joins, and query efficiency. Please think through this step by step and explain your initial thoughts about the question.

### Assistant Message 1

«SYS» The answer is C.

To determine the correct SQL query, let's break down the requirements step by step:

1. **\*\*Distinctive models\*\***: We need to find distinct models that match the given conditions. This means we should use the 'SELECT DISTINCT' clause.
2. **\*\*Maker with full name General Motors\*\***: This indicates we need to filter the data based on the 'FullName' of the maker, which is stored in the 'CAR\_MAKERS' table.
- 3.

### User Message 2

That's a good start. Can you explain more about why some options might be incorrect? Also, are there any key concepts or facts that are relevant to answering this question?

### Assistant Message 2

«SYS»

To evaluate the options, let's consider the following key concepts and facts:

\* \*\*Joining tables\*\*\*: We need to join multiple tables to retrieve the required information. The correct join order and type are crucial. \* \*\*Filtering conditions\*\*\*: We have two conditions to apply: the maker's full name should be 'General Motors' or the car's weight should be more than 3500. \* \*\*Using foreign keys\*\*\*: The foreign keys are defined as 'CAR

877

### User Message 3

Thank you for your detailed explanations. What is your final answer (A, B, C, or D)? You MUST first state your final answer in the format: 'The answer is X' where X is A, B, C, or D. After the final answer clearly explain your reasoning.

878

### 879 Final Response by Base and Evaluation by GPT4o

880 We can observe from the final response that the Base basically follows the reasoning from the  
881 response from the previous turns. It is moving towards the correct answer by reasoning is not  
882 comprehensive.

### Assistant Message 3

<SYS> group by clause, so option D is not correct. Now, let's consider the joins and subqueries in the other options.

The answer is C.

To solve this problem, we need to find the instructors who did not teach any courses. This can be achieved by identifying instructors who do not have a matching id in the 'teaches' table. We can use a subquery to select the ids of instructors who taught courses. Then, we can use the

883

### Evaluation Scores by GPT4o

| Criteria               | Score  | Rating |  |  |  |  |  |  |  |  |  |
|------------------------|--------|--------|--|--|--|--|--|--|--|--|--|
| Accuracy               | 7/10   |        |  |  |  |  |  |  |  |  |  |
| Reasoning Ability      | 6/10   |        |  |  |  |  |  |  |  |  |  |
| Comprehensiveness      | 5/10   |        |  |  |  |  |  |  |  |  |  |
| Pedagogical Value      | 6/10   |        |  |  |  |  |  |  |  |  |  |
| Confidence Calibration | 7/10   |        |  |  |  |  |  |  |  |  |  |
| Overall                | 6.0/10 |        |  |  |  |  |  |  |  |  |  |

884

### Evaluation Justifications by GPT4o

#### Accuracy: 7/10

The assistant is moving toward the correct answer (C) and has identified it as the correct choice. However, the explanation provided so far is incomplete, and the assistant has not yet fully justified why C is correct or why the other options are incorrect.

#### Reasoning Ability: 6/10

The reasoning is partially logical and clear, as the assistant has identified the need for 'SELECT DISTINCT', proper joins, and filtering conditions. However, the explanation lacks depth and precision, particularly in explaining the relationships between tables and why certain options fail to meet the requirements.

#### Comprehensiveness: 5/10

Key concepts like table joins, filtering conditions, and foreign key relationships are mentioned, but they are not fully explained. The assistant has not yet addressed why specific options (A, B, and D) are incorrect, which is critical for a comprehensive analysis.

#### Pedagogical Value: 6/10

The explanation has some educational value, as it introduces important SQL concepts like 'SELECT DISTINCT', filtering, and table joins. However, the lack of detailed reasoning and comparison between options limits its effectiveness as a learning resource.

#### Confidence Calibration: 7/10

The assistant confidently identifies C as the correct answer, which is accurate. However, the confidence is slightly undermined by the incomplete reasoning and lack of detailed analysis of the other options.

885

### Overall Assessment by GPT4o

#### Final Score: 6.0/10

**Summary:** The assistant is on the right track and has correctly identified the answer, but the explanation lacks depth, clarity, and comprehensiveness. While some key concepts are mentioned, the conversation would benefit from a more thorough analysis of why the other options are incorrect and a clearer breakdown of the relationships between tables.

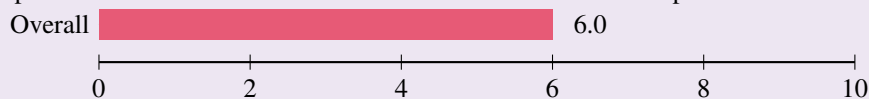

886

### Final Response by SWiFt and Evaluation by GPT4o

887 We now report the last turn of the conversation is shown here. We can observe from the final response  
888 of the SWiFt that its response is different from the response of the previous turn (and from Base) and  
889 is more accurate as judged by GPT4o.  
890

### Assistant Message 3

«SYS» The answer is C.

To determine the correct SQL query, let's break down the requirements step by step:

1. **\*\*Distinctive models\*\***: We need to find distinct models that match the given conditions. This means we should use the 'SELECT DISTINCT' clause.
2. **\*\*Maker with full name General Motors\*\***: This indicates we need to filter the data based on the 'FullName' of the maker, which is stored in the 'CAR\_MAKERS' table.
- 3.

891

892

| Evaluation Scores by GPT4o |        |             |             |             |             |             |             |             |             |
|----------------------------|--------|-------------|-------------|-------------|-------------|-------------|-------------|-------------|-------------|
| Criteria                   | Score  | Rating      |             |             |             |             |             |             |             |
| Accuracy                   | 8/10   | <div></div> |
| Reasoning Ability          | 7/10   | <div></div> |
| Comprehensiveness          | 6/10   | <div></div> |
| Pedagogical Value          | 5/10   | <div></div> |
| Confidence Calibration     | 7/10   | <div></div> |
| Overall                    | 6.6/10 | <div></div> |

893

| Evaluation Justifications by GPT4o                                                                                                                                                                                                                                 |  |  |  |  |  |  |  |  |  |
|--------------------------------------------------------------------------------------------------------------------------------------------------------------------------------------------------------------------------------------------------------------------|--|--|--|--|--|--|--|--|--|
| <b>Accuracy: 8/10</b>                                                                                                                                                                                                                                              |  |  |  |  |  |  |  |  |  |
| The response correctly identifies the correct answer as "C" and provides reasoning aligned with the question’s requirements. However, the explanation is incomplete and does not fully justify why "C" is correct or why other options are incorrect.              |  |  |  |  |  |  |  |  |  |
| <b>Reasoning Ability: 7/10</b>                                                                                                                                                                                                                                     |  |  |  |  |  |  |  |  |  |
| The reasoning is partially sound, as it breaks down the requirements of the query and links them to the SQL components. However, the explanation is truncated and does not fully analyze the relationships between tables or the logic of the query.               |  |  |  |  |  |  |  |  |  |
| <b>Comprehensiveness: 6/10</b>                                                                                                                                                                                                                                     |  |  |  |  |  |  |  |  |  |
| The response addresses some key aspects of the question, such as the need for ‘SELECT DISTINCT’ and filtering by ‘FullName’. However, it does not explore the schema relationships, optional foreign keys, or why the other options fail to meet the requirements. |  |  |  |  |  |  |  |  |  |
| <b>Pedagogical Value: 5/10</b>                                                                                                                                                                                                                                     |  |  |  |  |  |  |  |  |  |
| The response provides some educational value by explaining the use of ‘SELECT DISTINCT’ and filtering conditions. However, it lacks depth and does not guide the reader through the full reasoning process or clarify why the correct query works.                 |  |  |  |  |  |  |  |  |  |
| <b>Confidence Calibration: 7/10</b>                                                                                                                                                                                                                                |  |  |  |  |  |  |  |  |  |
| The response confidently states that the correct answer is "C" and provides some justification. However, the incomplete explanation leaves room for doubt about whether the reasoning is fully understood.                                                         |  |  |  |  |  |  |  |  |  |

894

| Overall Assessment by GPT4o                                                                                                                                                                                                                            |             |   |   |   |   |    |  |  |     |
|--------------------------------------------------------------------------------------------------------------------------------------------------------------------------------------------------------------------------------------------------------|-------------|---|---|---|---|----|--|--|-----|
| <b>Final Score: 6.6/10</b>                                                                                                                                                                                                                             |             |   |   |   |   |    |  |  |     |
| <b>Summary:</b> While the response identifies the correct answer and provides some reasoning, it lacks thoroughness, depth, and a complete analysis of the question and options. Improvements in comprehensiveness and pedagogical clarity are needed. |             |   |   |   |   |    |  |  |     |
| Overall                                                                                                                                                                                                                                                | <div></div> |   |   |   |   |    |  |  | 6.6 |
|                                                                                                                                                                                                                                                        | 0           | 2 | 4 | 6 | 8 | 10 |  |  |     |

895

D.3 MathDial Prompt Example

896

We now present the prompt examples from MathDial dataset.

### User Message 1

Drew is reseeding his lawn with grass seed. One bag of grass seed covers 250 square feet of lawn. His lawn is 22 feet from the house to the curb and 36 feet from side to side. He bought four bags of seed. How many extra square feet could the leftover grass seed cover after Drew reseeds his lawn?

A student attempted to solve this problem as follows: The area of Drew's lawn is  $22 \times 36 = 792$  square feet. Four bags of grass seed can cover  $4 \times 250 = 1000$  square feet. Drew will use all the grass seed to cover his lawn, so there won't be any leftover to cover extra square feet. Therefore, the leftover grass seed can't cover any extra square feet. 0

Which of the following is the correct final answer? A. 177 B. 0 C. 138 D. 208

Please use <thinking></thinking> tags to show your step-by-step reasoning.

897

### Assistant Message 1

«SYS»[/SYS]

The answer is B. <thinking> The student correctly calculated the area of the lawn, which is  $22 \times 36 = 792$  square feet. Then, they calculated the total area that the four bags of grass seed could cover, which is  $4 \times 250 = 1000$  square feet. However, they incorrectly concluded that there would be no leftover grass seed because the area of the lawn (792 square feet) is less than the total area that the grass seed could cover (1000 square feet). This

898

### User Message 2

Can you explain more about why some options might be incorrect? Use <thinking></thinking> tags for your analysis.

899

### Assistant Message 2

«/SYS»

The answer is B. <thinking> The student's conclusion is incorrect because they didn't take into account the fact that the lawn is a rectangle and the grass seed can only cover the area of the lawn. The total area that the grass seed can cover (1000 square feet) is greater than the area of the lawn (792 square feet), but that doesn't mean that the entire lawn can be covered with the grass seed. In fact, the student's calculation

900

### User Message 3

Thank you for your detailed explanations. What is your final answer (A, B, C, or D)? Please provide a justification for your choice. You MUST first state your final answer in the format: 'The answer is X' where X is A, B, C, or D. The final answer must be outside the thinking tags. Then show your thinking in <thinking></thinking> tags for your step-by-step reasoning.

901

902 **Final Response by Base and Evaluation by GPT4o**

### Assistant Message 3

«/SYS»

The answer is B.

<thinking> The student's conclusion is incorrect because they didn't take into account the fact that the lawn is a rectangle and the grass seed can only cover the area of the lawn. The total area that the grass seed can cover (1000 square feet) is

903



### Evaluation Scores by GPT4o

| Criteria               | Score         | Rating |   |   |   |   |   |   |   |   |   |
|------------------------|---------------|--------|---|---|---|---|---|---|---|---|---|
| Accuracy               | 3/10          | ■      | ■ | ■ | □ | □ | □ | □ | □ | □ | □ |
| Reasoning Ability      | 4/10          | ■      | ■ | ■ | ■ | □ | □ | □ | □ | □ | □ |
| Comprehensiveness      | 3/10          | ■      | ■ | ■ | □ | □ | □ | □ | □ | □ | □ |
| Pedagogical Value      | 4/10          | ■      | ■ | ■ | ■ | □ | □ | □ | □ | □ | □ |
| Confidence Calibration | 2/10          | ■      | ■ | □ | □ | □ | □ | □ | □ | □ | □ |
| <b>Overall</b>         | <b>3.0/10</b> | ■      | ■ | ■ | □ | □ | □ | □ | □ | □ | □ |

### Evaluation Justifications by GPT4o

#### Accuracy: 3/10

The assistant is moving toward the correct answer but has not yet explicitly identified the correct choice (D). The reasoning provided so far contains errors and does not correctly calculate the leftover area of grass seed.

#### Reasoning Ability: 4/10

The reasoning is partially logical but lacks clarity and precision. The assistant identifies that the lawn area is smaller than the total coverage of the grass seed but fails to complete the calculation or address the leftover area properly.

#### Comprehensiveness: 3/10

Key concepts, such as how to calculate the leftover area ( $1000 - 792 = 208$ ), are not properly explained. The assistant does not address why the other options are incorrect or provide a full step-by-step breakdown.

#### Pedagogical Value: 4/10

The explanation has some educational value but is incomplete and potentially confusing. It does not guide the user through the correct process of solving the problem or clarify misconceptions.

#### Confidence Calibration: 2/10

The assistant is overly confident in stating that the answer is B, despite providing flawed reasoning and failing to justify the conclusion properly. Confidence is not appropriately calibrated to the accuracy of the analysis.

### Overall Assessment by GPT4o

## Final Score: 3.0/10

**Summary:** The conversation demonstrates some progress toward solving the problem but lacks accuracy, clarity, and comprehensiveness. The assistant's reasoning is incomplete, and the explanation does not effectively teach the correct approach to solving the question.

Overall  3.0

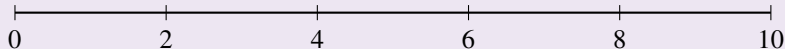

### Final Response by SWiFt and Evaluation by GPT4o

We can observe from the final response of the SWiFt that its response is different from the response of the previous turn (and from Base) and is better as judged by GPT4o.

### Assistant Message 3

The answer is D.

<thinking> Let me carefully work through this problem step by step:

1. First, I need to calculate the total area of Drew's lawn: Length = 22 feet Width = 36 feet  
Area of lawn =  $22 \times 36 = 792$  square feet

2. Next, I need to determine the total coverage provided by four bags of grass seed: One bag covers 250 square feet Four bags can cover  $4 \times 250 = 1000$  square feet

3. Since Drew will use the grass seed to cover his lawn first, I need to find how much grass seed will be left over: Leftover grass seed coverage = Total coverage - Lawn area Leftover grass seed coverage =  $1000 - 792 = 208$  square feet

Looking at the answer choices: - A. 177 square feet - This is incorrect. It's not clear how this value was derived. - B. 0 square feet - This is what the student incorrectly concluded, assuming all seed would be used. - C. 138 square feet - This is incorrect. It's not clear how this value was derived. - D. 208 square feet - This matches my calculation of  $1000 - 792 = 208$  square feet.

Therefore, the answer is D. The leftover grass seed could cover an additional 208 square feet.

</thinking>

910

### Evaluation Scores by GPT4o

| Criteria               | Score         | Rating |  |  |  |  |  |  |  |  |  |
|------------------------|---------------|--------|--|--|--|--|--|--|--|--|--|
| Accuracy               | 5/10          |        |  |  |  |  |  |  |  |  |  |
| Reasoning Ability      | 6/10          |        |  |  |  |  |  |  |  |  |  |
| Comprehensiveness      | 4/10          |        |  |  |  |  |  |  |  |  |  |
| Pedagogical Value      | 5/10          |        |  |  |  |  |  |  |  |  |  |
| Confidence Calibration | 3/10          |        |  |  |  |  |  |  |  |  |  |
| <b>Overall</b>         | <b>5.0/10</b> |        |  |  |  |  |  |  |  |  |  |

911

Table 13: Model Performance Comparison - Thinking Mode (OpenBookQA (n=4))

| Model        | Accuracy        | Thinking (%) | R Overall   | R Accuracy  | R Reasoning | R Comprehensive | R Pedagogic | R Confidence |
|--------------|-----------------|--------------|-------------|-------------|-------------|-----------------|-------------|--------------|
| SWiFt (ours) | 0.9333 ± 0.0644 | 93.3 ± 0.0   | 8.32 ± 0.27 | 9.27 ± 0.38 | 8.47 ± 0.22 | 7.40 ± 0.24     | 7.80 ± 0.35 | 9.13 ± 0.41  |
| ReFit (ours) | 0.9333 ± 0.0644 | 93.3 ± 0.0   | 8.23 ± 0.33 | 9.27 ± 0.37 | 8.47 ± 0.27 | 7.40 ± 0.31     | 7.87 ± 0.31 | 8.87 ± 0.52  |

#### Evaluation Justifications by GPT4o

##### Accuracy: 5/10

The assistant has correctly calculated the area of the lawn (792 square feet) and the total coverage of four bags of grass seed (1000 square feet). However, the assistant prematurely states that the answer is "A" without fully completing the calculations or verifying the leftover area, which leads to an incorrect conclusion.

##### Reasoning Ability: 6/10

The assistant demonstrates some logical reasoning by breaking the problem into steps (calculating the lawn area and total coverage). However, the reasoning is incomplete, as the assistant does not finish analyzing the leftover area or fully explain why "A" is chosen.

##### Comprehensiveness: 4/10

The explanation is missing key steps, such as subtracting the lawn area from the total coverage to determine the leftover area (1000 - 792 = 208). Additionally, the assistant does not fully analyze all the options, leaving the explanation incomplete and confusing.

##### Pedagogical Value: 5/10

While the assistant starts with a structured approach, the incomplete reasoning and incorrect conclusion could mislead a learner. The explanation lacks clarity and depth, which limits its educational value.

##### Confidence Calibration: 3/10

The assistant confidently states that the answer is "A" without completing the necessary calculations or fully analyzing the problem. This overconfidence is unwarranted given the incomplete reasoning.

#### Overall Assessment by GPT4o

### Final Score: 5.0/10

**Summary:** The assistant shows some understanding of the problem and begins with a logical approach, but the incomplete reasoning, incorrect answer, and lack of thorough analysis significantly detract from the overall quality of the conversation.

Overall  5.0

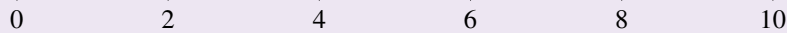

## E Ablation Studies

We present the ablation studies for SWiFt and ReFit for the OpenBookQA dataset by increasing  $n=4,6,8$  and 10. This is shown in Table 13-16. We see that with larger values of  $n$ , the R overall keeps decreasing as it becomes a harder task.

Table 14: Model Performance Comparison - Thinking Mode (OpenBookQA (n=6))

| Model        | Accuracy                              | Thinking (%)                      | R Overall                         | R Accuracy                        | R Reasoning                       | R Comprehensive                   | R Pedagogic                       | R Confidence                      |
|--------------|---------------------------------------|-----------------------------------|-----------------------------------|-----------------------------------|-----------------------------------|-----------------------------------|-----------------------------------|-----------------------------------|
| SWiFt (ours) | 0.8667 $\pm$ 0.0878                   | <b>100.0 <math>\pm</math> 0.0</b> | 7.68 $\pm$ 0.63                   | 8.67 $\pm$ 0.77                   | 7.93 $\pm$ 0.52                   | 6.93 $\pm$ 0.52                   | 7.33 $\pm$ 0.61                   | 8.33 $\pm$ 0.75                   |
| ReFit (ours) | <b>1.0000 <math>\pm</math> 0.0000</b> | <b>100.0 <math>\pm</math> 0.0</b> | <b>8.53 <math>\pm</math> 0.22</b> | <b>9.80 <math>\pm</math> 0.20</b> | <b>8.53 <math>\pm</math> 0.22</b> | <b>7.47 <math>\pm</math> 0.24</b> | <b>8.40 <math>\pm</math> 0.25</b> | <b>9.60 <math>\pm</math> 0.16</b> |

Table 15: Model Performance Comparison - Thinking Mode (OpenBookQA (n=8))

| Model        | Accuracy                              | Thinking (%)                     | R Overall                         | R Accuracy                        | R Reasoning                       | R Comprehensive                   | R Pedagogic                       | R Confidence                      |
|--------------|---------------------------------------|----------------------------------|-----------------------------------|-----------------------------------|-----------------------------------|-----------------------------------|-----------------------------------|-----------------------------------|
| SWiFt (ours) | 0.8000 $\pm$ 0.1033                   | 73.3 $\pm$ 0.0                   | 6.87 $\pm$ 1.00                   | 7.87 $\pm$ 1.06                   | 6.80 $\pm$ 1.05                   | 6.13 $\pm$ 0.96                   | 6.47 $\pm$ 1.03                   | 7.47 $\pm$ 1.05                   |
| ReFit (ours) | <b>0.9333 <math>\pm</math> 0.0644</b> | <b>93.3 <math>\pm</math> 0.0</b> | <b>7.91 <math>\pm</math> 0.66</b> | <b>8.93 <math>\pm</math> 0.70</b> | <b>8.00 <math>\pm</math> 0.68</b> | <b>7.20 <math>\pm</math> 0.59</b> | <b>7.60 <math>\pm</math> 0.63</b> | <b>8.60 <math>\pm</math> 0.75</b> |

Table 16: Model Performance Comparison - Thinking Mode (OpenBookQA (n=10))

| Model        | Accuracy                              | Thinking (%)                     | R Overall                         | R Accuracy                        | R Reasoning                       | R Comprehensive                   | R Pedagogic                       | R Confidence                      |
|--------------|---------------------------------------|----------------------------------|-----------------------------------|-----------------------------------|-----------------------------------|-----------------------------------|-----------------------------------|-----------------------------------|
| SWiFt (ours) | 0.6000 $\pm$ 0.1265                   | 80.0 $\pm$ 0.0                   | 6.14 $\pm$ 0.95                   | 7.02 $\pm$ 1.11                   | 6.33 $\pm$ 0.90                   | 5.53 $\pm$ 0.80                   | 6.07 $\pm$ 0.91                   | 6.69 $\pm$ 1.11                   |
| ReFit (ours) | <b>0.8667 <math>\pm</math> 0.0878</b> | <b>93.3 <math>\pm</math> 0.0</b> | <b>7.85 <math>\pm</math> 0.73</b> | <b>8.73 <math>\pm</math> 0.82</b> | <b>7.87 <math>\pm</math> 0.74</b> | <b>7.07 <math>\pm</math> 0.61</b> | <b>7.73 <math>\pm</math> 0.68</b> | <b>8.47 <math>\pm</math> 0.88</b> |

## F Radar Plots

In this section we present the radar plots for the reward estimation on various datasets in Figure 1- Figure 5.

## G Model and Training Parameters

In this section, we present the model configuration and training parameters for our framework in Table 17-Table 21.

| Parameter                                     | Value                    |
|-----------------------------------------------|--------------------------|
| vocab_size                                    | 128256                   |
| max_position_embeddings                       | 131072                   |
| hidden_size                                   | 4096                     |
| intermediate_size                             | 14336                    |
| num_hidden_layers                             | 32                       |
| num_attention_heads                           | 32                       |
| num_key_value_heads                           | 8                        |
| hidden_act                                    | silu                     |
| initializer_range                             | 0.02                     |
| rms_norm_eps                                  | 1e-05                    |
| pretraining_tp                                | 1                        |
| use_cache                                     | true                     |
| rope_theta                                    | 500000.0                 |
| rope_scaling.factor                           | 8.0                      |
| rope_scaling.low_freq_factor                  | 1.0                      |
| rope_scaling.high_freq_factor                 | 4.0                      |
| rope_scaling.original_max_position_embeddings | 8192                     |
| rope_scaling.rope_type                        | llama3                   |
| head_dim                                      | 128                      |
| torch_dtype                                   | bfloat16                 |
| bos_token_id                                  | 128000                   |
| eos_token_id                                  | [128001, 128008, 128009] |
| model_type                                    | llama                    |
| architectures                                 | LlamaForCausalLM         |

Table 17: Llama 3.1 8B Instruct Configuration

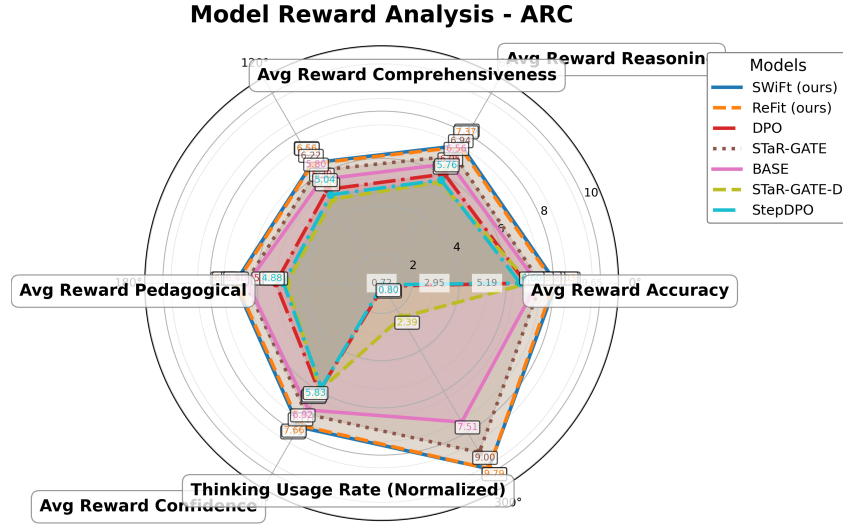

Figure 1: Model reward comparison for ARC, showing performance across six reward dimensions (Accuracy, Reasoning, Comprehensiveness, Pedagogical, Confidence, and normalized Thinking Usage Rate).

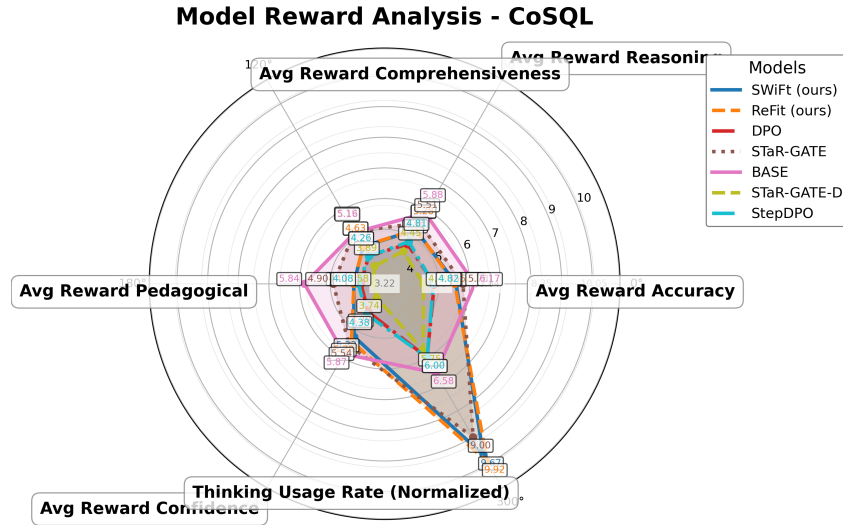

Figure 2: Model reward comparison for CoSQL, showing performance across six reward dimensions (Accuracy, Reasoning, Comprehensiveness, Pedagogical, Confidence, and normalized Thinking Usage Rate).

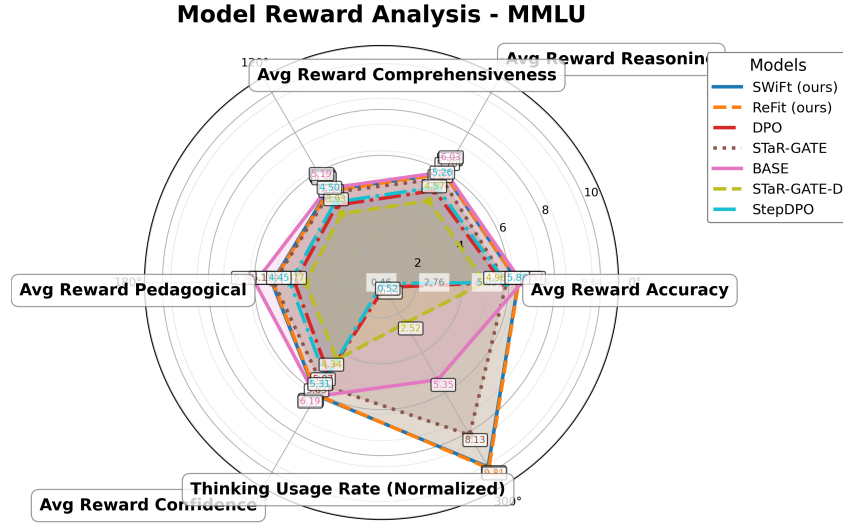

Figure 3: Model reward comparison for MMLU, showing performance across six reward dimensions (Accuracy, Reasoning, Comprehensiveness, Pedagogical, Confidence, and normalized Thinking Usage Rate).

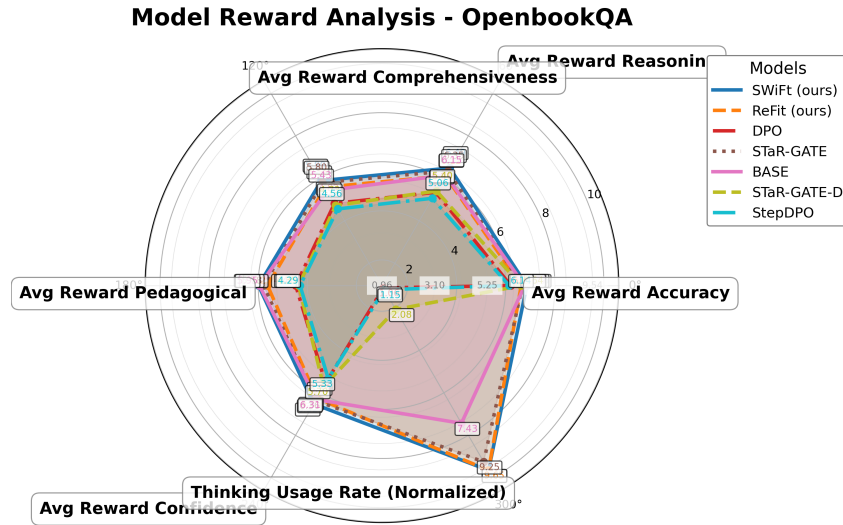

Figure 4: Model reward comparison for OpenbookQA, showing performance across six reward dimensions (Accuracy, Reasoning, Comprehensiveness, Pedagogical, Confidence, and normalized Thinking Usage Rate).



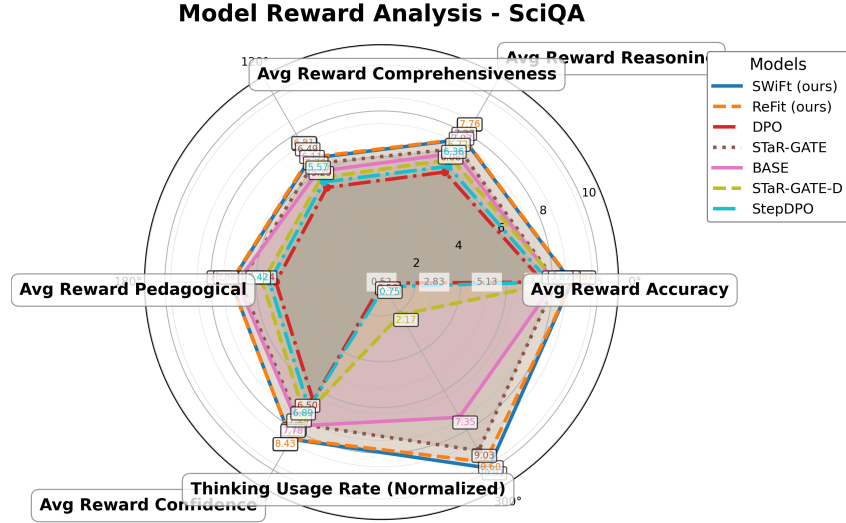

Figure 5: Model reward comparison for SciQA, showing performance across six reward dimensions (Accuracy, Reasoning, Comprehensiveness, Pedagogical, Confidence, and normalized Thinking Usage Rate..

| Parameter                   | Value         |
|-----------------------------|---------------|
| compute_environment         | LOCAL_MACHINE |
| debug                       | false         |
| distributed_type            | DEEPSPEED     |
| downcast_bf16               | no            |
| enable_cpu_affinity         | false         |
| machine_rank                | 0             |
| main_training_function      | main          |
| mixed_precision             | bf16          |
| num_machines                | 1             |
| num_processes               | 2             |
| rdzv_backend                | static        |
| same_network                | true          |
| tpu_use_cluster             | false         |
| tpu_use_sudo                | false         |
| use_cpu                     | false         |
| <b>deepspeed_config</b>     |               |
| gradient_accumulation_steps | 4             |
| gradient_clipping           | 1.0           |
| offload_optimizer_device    | cpu           |
| offload_param_device        | cpu           |
| zero3_init_flag             | false         |
| zero3_save_16bit_model      | true          |
| zero_stage                  | 2             |

Table 18: Accelerate DeepSpeed Configuration

## H Analysis of Language Pattern Clustering in Policy Responses

### H.1 Methodology

We applied UMAP [42] dimensionality reduction to visualize how two language policies (Base and SWiFt) differ in their responses. The approach consisted of two key steps:

1. Common word clustering: Responses were first grouped into five distinct language patterns (labeled 0-4) based on similar common word usage

| Parameter                   | Value         |
|-----------------------------|---------------|
| compute_environment         | LOCAL_MACHINE |
| debug                       | false         |
| distributed_type            | DEEPSPEED     |
| downcast_bf16               | no            |
| machine_rank                | 0             |
| mixed_precision             | bf16          |
| num_machines                | 1             |
| num_processes               | 2             |
| use_cpu                     | false         |
| <b>deepspeed_config</b>     |               |
| gradient_accumulation_steps | 4             |
| gradient_clipping           | 1.0           |
| offload_optimizer_device    | none          |
| offload_param_device        | none          |
| zero3_init_flag             | false         |
| zero3_save_16bit_model      | true          |
| zero_stage                  | 0             |

Table 19: Accelerate DeepSpeed Configuration for Knowledge Distillation

930 2. Uncommon word visualization: Responses were then positioned in 2D space based on their  
931 uncommon word usage

932 This methodology allows us to observe both structural similarities in response patterns and distinctive  
933 vocabulary differences between policies.

## 934 H.2 Technical Implementation

### 935 H.2.1 Data Processing Pipeline

936 The visualization pipeline involved several sequential processing steps:

- 937 1. **Text Extraction:** Model responses were extracted from the JSON files, specifically targeting  
938 the `predicted_answer` field.
- 939 2. **Common Word Identification:** Words were classified as "common" based on their fre-  
940 quency distribution across both policies. A word was considered common if:
  - 941 • It appeared with frequency  $\geq 0.01$  in either policy
  - 942 • The frequency ratio between policies was within the range  $[0.8, 1.2]$  (using a frequency  
943 ratio parameter of 0.2)
  - 944 • Standard stopwords and domain-specific terms (e.g., "answer", "question", "correct")  
945 were always included as common words
- 946 3. **Text Splitting:** Each response was split into two components:
  - 947 • A common-words-only text containing only words classified as common
  - 948 • An uncommon-words-only text containing the remaining vocabulary
- 949 4. **Common Word Clustering:** The common-words-only texts were vectorized using TF-IDF  
950 (with parameters: `max_features=5000`, `min_df=2`, `max_df=0.9`, `sublinear_tf=True`) and  
951 clustered using K-means (`k=5`, `random_state=42`) to identify the five language patterns.
- 952 5. **Uncommon Word Vectorization:** The uncommon-words-only texts were similarly vector-  
953 ized using TF-IDF with the same parameters.
- 954 6. **UMAP Projection:** The uncommon word vectors were projected into 2D space using  
955 UMAP.

### 956 H.2.2 UMAP Configuration

957 The UMAP algorithm was configured with the following parameters:

| Parameter                     | Value                                               |
|-------------------------------|-----------------------------------------------------|
| <b>Model Configuration</b>    |                                                     |
| model_name                    | Llama-3.1-8B-Instruct                               |
| Comments                      | Customized to do RL Reweighting for ReFit and SWiFt |
| <b>Training Parameters</b>    |                                                     |
| learning_rate                 | 3e-5                                                |
| num_train_epochs              | 4                                                   |
| per_device_train_batch_size   | 8                                                   |
| gradient_accumulation_steps   | 4                                                   |
| gradient_checkpointing        | True                                                |
| mixed_precision               | bf16                                                |
| do_train                      | True                                                |
| do_eval                       | False                                               |
| logging_steps                 | 5                                                   |
| logging_first_step            | True                                                |
| save_strategy                 | epoch                                               |
| save_total_limit              | 4                                                   |
| <b>RL Configuration</b>       |                                                     |
| dataset                       | From the listed datasets in this paper.json         |
| rl_reweight                   | std                                                 |
| rl_reward_name                | reward                                              |
| use_custom_trainer            | True                                                |
| <b>Hardware Configuration</b> |                                                     |
| num_processes                 | 2                                                   |
| num_machines                  | 1                                                   |

Table 20: TRL Supervised Fine-Tuning Configuration with Customized model RL Reweighting for ReFit and SWiFt

- **n\_neighbors = 15:** This parameter controls the balance between preserving local versus global structure. A value of 15 provides a moderate balance, allowing the algorithm to capture both local relationships between similar responses and the overall distribution pattern.
- **min\_dist = 0.1:** This parameter controls how tightly points are allowed to be packed together. The relatively low value of 0.1 allows for dense clusters to form when points are very similar, while still providing separation between distinct groups.
- **metric = "euclidean":** Euclidean distance was used to measure similarity between vectors, providing a straightforward geometric interpretation of distances in the high-dimensional space.
- **n\_components = 2:** The output dimensionality was set to 2 for visualization purposes.
- **random\_state = 42:** A fixed random seed was used to ensure reproducibility across different runs.

### H.2.3 Vectorization Approach

The TF-IDF vectorization was critical to the analysis:

- A maximum of 5,000 features were retained for computational efficiency
- Words appearing in fewer than 2 responses (min\_df=2) were excluded to reduce noise
- Words appearing in more than 90% of responses (max\_df=0.9) were downweighted to focus on discriminative terms
- Sublinear term frequency scaling was applied to dampen the effect of highly frequent terms
- L2 normalization was applied to account for varying response lengths

| Parameter                      | Value                                                         |
|--------------------------------|---------------------------------------------------------------|
| <b>Model Configuration</b>     |                                                               |
| teacher_model_path             | STaR-GATE_last-checkpoint                                     |
| student_model_name             | meta-llama/Llama-3.1-8B-Instruct                              |
| student_layers                 | 8                                                             |
| apply_lora_to_teacher          | True                                                          |
| <b>LoRA Configuration</b>      |                                                               |
| r                              | 8                                                             |
| alpha                          | 16                                                            |
| dropout                        | 0.05                                                          |
| target_modules                 | q_proj, v_proj, k_proj, o_proj, gate_proj, up_proj, down_proj |
| <b>Distillation Parameters</b> |                                                               |
| distillation_alpha             | 0.5                                                           |
| distillation_temperature       | 2.0                                                           |
| <b>Training Parameters</b>     |                                                               |
| learning_rate                  | 3e-6                                                          |
| num_train_epochs               | 2                                                             |
| per_device_train_batch_size    | 4                                                             |
| gradient_accumulation_steps    | 4                                                             |
| gradient_checkpointing         | True                                                          |
| mixed_precision                | bf16                                                          |
| do_train                       | True                                                          |
| do_eval                        | False                                                         |
| logging_steps                  | 5                                                             |
| logging_first_step             | True                                                          |
| save_strategy                  | epoch                                                         |
| save_total_limit               | 4                                                             |
| <b>Dataset Configuration</b>   |                                                               |
| dataset                        | From the listed datasets in this paper                        |
| rl_reweight                    | SFT                                                           |
| use_custom_trainer             | False                                                         |
| <b>Hardware Configuration</b>  |                                                               |
| num_processes                  | 2                                                             |
| num_machines                   | 1                                                             |

Table 21: Knowledge Distillation Configuration with LoRA

This vectorization approach ensures that the resulting vectors capture the relative importance of terms within each response while accounting for the overall corpus characteristics.

### H.3 Results on Multiple Datasets

We applied our analysis to two the datasets: ARC and SciQA.

#### H.3.1 Analysis of ARC Dataset Visualization

Figure 6(a) shows the UMAP visualization for the ARC dataset, which contains grade-school level, multiple-choice science questions requiring reasoning. Several key observations emerge:

- **Dominant Cluster:** A substantial majority of responses are concentrated in a large, dense cluster on the right side of the visualization. This suggests that both policies adopt similar language patterns when answering reasoning-based questions, with Pattern 0 being the dominant structure.
- **Model Intermingling:** Within the main cluster, blue points (Base policy) and orange points (SWiFT policy) are thoroughly intermixed, indicating that both policies use similar uncommon vocabulary when following Pattern 0’s common word structure.

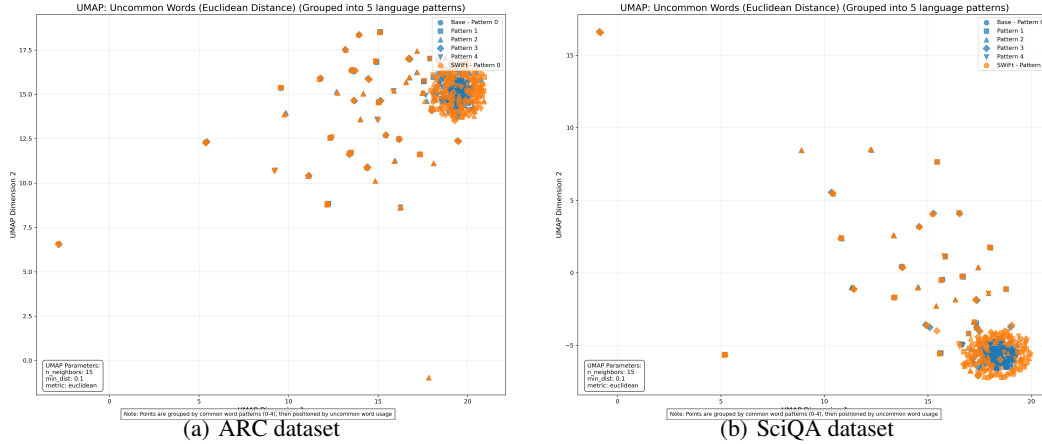

Figure 6: UMAP visualizations of policy responses using Euclidean distance. Points are grouped by common word patterns (0-4), then positioned by uncommon word usage. Blue points represent **Base** policy (Llama3-8.1b-rl); orange points represent **SWiFt** policy (Llama3-8.1b-instruct).

- **Greater SWiFt Diversity:** The visualization shows a clear preponderance of orange points (**SWiFt**) outside the main cluster, suggesting that the **SWiFt** policy produces more diverse responses than the **Base** policy on reasoning tasks.
- **Distinctive Patterns:** Pattern 2 (triangles) appears frequently throughout the visualization, suggesting a secondary response structure that both policies employ for certain types of reasoning questions.
- **Outlier Distribution:** Several isolated points and small clusters appear throughout the space, primarily from the **SWiFt** policy, indicating occasional unique response formulations that deviate significantly from standard patterns.

The distribution suggests that for reasoning-oriented questions in the ARC dataset, both policies share a primary response structure, but the **SWiFt** policy demonstrates greater flexibility and variety in its formulations.

### H.3.2 Analysis of SciQA Dataset Visualization

Figure 6(b) presents the UMAP visualization for the SciQA dataset, which focuses on science exam questions requiring factual knowledge. The visualization reveals markedly different patterns compared to the ARC dataset:

- **Tight Central Cluster:** A highly concentrated cluster appears in the lower right quadrant, containing responses from both policies, though with a noticeably denser concentration of **Base** policy (blue) points at its core.
- **Concentric Organization:** The **SWiFt** policy's responses (orange) appear to form a looser ring around the dense **Base** policy core, suggesting that while following similar patterns, the **SWiFt** policy introduces more variation in uncommon word usage.
- **Sparse Distribution:** Unlike the ARC visualization, the SciQA responses show greater separation between the main cluster and outlier points, with fewer intermediate points, suggesting more distinct response categories.
- **Pattern Distribution:** Patterns 1 and 2 (squares and triangles) appear predominantly in the periphery, indicating alternative response structures employed primarily by the **SWiFt** policy for specific types of science questions.
- **Vertical Axis Separation:** Points show greater dispersion along the vertical axis compared to the ARC visualization, potentially indicating a stronger secondary response dimension specific to factual science questions.

1024 The SciQA visualization demonstrates that for factual science questions, the **Base** policy consistently  
1025 follows a very standardized response pattern, while the **SWiFt** policy exhibits greater variability,  
1026 suggesting it may employ more diverse explanation strategies.

#### 1027 **H.4 Cross-Dataset Comparisons**

1028 Comparing Figures 6(a) and 6(b) reveals several important distinctions in how policies approach  
1029 different question types:

- 1030 1. **Cluster Density:** The ARC visualization shows a more diffuse distribution of points  
1031 compared to the tighter, more polarized clustering in the SciQA visualization, suggesting  
1032 greater response diversity for reasoning questions than for factual questions.
- 1033 2. **Model Separation:** While both visualizations show some intermingling of policies, the  
1034 SciQA dataset displays a clearer separation between policies within the main cluster, with  
1035 the **Base** policy forming a denser core.
- 1036 3. **Pattern Usage:** Pattern 0 (circles) dominates both visualizations, but secondary patterns  
1037 appear more evenly distributed in the ARC dataset, suggesting that reasoning questions  
1038 elicit a wider variety of response structures than factual questions.
- 1039 4. **Outlier Behavior:** Both visualizations show outlier points, but their distribution differs:  
1040 ARC outliers tend to form small clusters, while SciQA outliers appear more isolated,  
1041 potentially indicating different mechanisms for unusual responses across task types.

1042 These cross-dataset comparisons suggest that the policies' response strategies vary not only between  
1043 policies but also systematically across different question types, with reasoning questions eliciting  
1044 more diverse responses than factual questions.

#### 1045 **H.5 Implications**

1046 These visualizations reveal several important insights about the policies:

- 1047 1. The **SWiFt** policy demonstrates greater linguistic diversity across both datasets, employing  
1048 a wider range of both common and uncommon word patterns.
- 1049 2. Both policies share fundamental response structures (particularly Pattern 0), suggesting they  
1050 rely on similar foundational patterns despite different training approaches.
- 1051 3. The **Base** policy appears more conservative in its response generation, clustering tightly  
1052 around established patterns, especially for factual questions in the SciQA dataset.
- 1053 4. The presence of clear pattern clusters suggests that these language policies develop distinct  
1054 "response templates" rather than generating completely unique responses for each input.
- 1055 5. The more pronounced diversity observed in the ARC dataset suggests that reasoning ques-  
1056 tions may allow or require greater variation in response formulation than factual questions.
- 1057 6. The dimensional reduction approach used here offers advantages over traditional evaluation  
1058 metrics by revealing structural patterns in policy outputs that might otherwise remain hidden.
